# Supplementary material for: Comparative analysis of non-coding RNAs in the antibiotic-producing Streptomyces bacteria
Source: PubMed Central journal article supplement (PMC3765725; doi:10.1186/1471-2164-14-558), 2013-08-16
Supplement: 1471-2164-14-558-S1.pdf [file 1471-2164-14-558-S1.pdf]

**Table S1: Classification of antisense RNAs in *S. coelicolor*, *S. avermitilis* and *S. venezuelae***

| <b>Sense gene<sup>abcd</sup></b> | <b>cis-antisense RNA</b> | <b>cutoRNA</b> | <b>Divergent transcription</b> | <b>Unclassified*</b> | <b>Biosynthetic clusters<sup>x</sup></b> |
|----------------------------------|--------------------------|----------------|--------------------------------|----------------------|------------------------------------------|
| <i>sco0058</i>                   | -                        | -              | -                              | Y                    | -                                        |
| <i>sco0102</i>                   | Y                        | -              | -                              | -                    | -                                        |
| <i>sco0103</i>                   | Y                        | -              | -                              | -                    | -                                        |
| <i>sco0166</i>                   | -                        | Y              | -                              | -                    | -                                        |
| <i>sco0195</i>                   | Y                        | -              | -                              | -                    | -                                        |
| <i>sco0224</i>                   | -                        | Y              | -                              | -                    | -                                        |
| <i>sco0297</i>                   | Y                        | -              | -                              | -                    | -                                        |
| <i>sco0298</i>                   | Y                        | -              | -                              | -                    | -                                        |
| <i>sco0324</i>                   | -                        | Y              | -                              | -                    | -                                        |
| <i>sco0402</i>                   | -                        | Y              | -                              | -                    | -                                        |
| <i>sco0412</i>                   | -                        | Y              | -                              | -                    | -                                        |
| <i>sco0460</i>                   | -                        | Y              | -                              | -                    | -                                        |
| <i>sco0477</i>                   | -                        | Y              | -                              | -                    | -                                        |
| <i>sco0490</i>                   | -                        | Y              | -                              | -                    | Coelichelin                              |
| <i>sco0491</i>                   | -                        | Y              | -                              | -                    | Coelichelin                              |
| <i>sco0500<sup>d</sup></i>       | -                        | -              | -                              | Y                    | -                                        |
| <i>sco0562</i>                   | -                        | -              | -                              | Y                    | -                                        |
| <i>sco0591</i>                   | -                        | -              | -                              | Y                    | -                                        |
| <i>sco0592</i>                   | -                        | Y              | -                              | -                    | -                                        |
| <i>sco0681</i>                   | -                        | Y              | -                              | -                    | -                                        |
| <i>sco0682</i>                   | -                        | Y              | -                              | -                    | -                                        |
| <i>sco0695</i>                   | -                        | -              | -                              | Y                    | -                                        |
| <i>sco0729</i>                   | -                        | -              | -                              | Y                    | -                                        |
| <i>sco0732</i>                   | -                        | Y              | -                              | -                    | -                                        |
| <i>sco0733</i>                   | -                        | -              | -                              | Y                    | -                                        |
| <i>sco0735</i>                   | -                        | Y              | -                              | -                    | -                                        |
| <i>sco0742</i>                   | -                        | Y              | -                              | -                    | -                                        |
| <i>sco0763</i>                   | -                        | Y              | -                              | -                    | -                                        |
| <i>sco0798</i>                   | -                        | Y              | -                              | -                    | -                                        |
| <i>sco0884</i>                   | -                        | Y              | -                              | -                    | -                                        |
| <i>sco0908</i>                   | -                        | Y              | -                              | -                    | -                                        |
| <i>sco0909</i>                   | -                        | Y              | -                              | -                    | -                                        |
| <i>sco0927</i>                   | -                        | Y              | -                              | -                    | -                                        |
| <i>sco0954</i>                   | Y                        | -              | -                              | -                    | -                                        |
| <i>sco0973</i>                   | -                        | Y              | -                              | -                    | -                                        |
| <i>sco0974</i>                   | -                        | Y              | -                              | -                    | -                                        |
| <i>sco0975</i>                   | -                        | Y              | -                              | -                    | -                                        |
| <i>sco0976</i>                   | -                        | Y              | -                              | -                    | -                                        |
| <i>sco0988</i>                   | -                        | -              | -                              | Y                    | -                                        |
| <i>sco0989</i>                   | -                        | Y              | -                              | -                    | -                                        |

|                      |   |   |   |   |   |
|----------------------|---|---|---|---|---|
| sco0998              | - | - | - | Y | - |
| sco1019              | - | Y | - | - | - |
| sco1025              | - | - | - | Y | - |
| sco1039              | - | Y | - | - | - |
| sco1069              | - | - | - | Y | - |
| sco1071              | Y | - | - | - | - |
| sco1075              | - | Y | - | - | - |
| sco1086              | - | Y | - | - | - |
| sco1104              | - | Y | - | - | - |
| sco1117              | - | - | - | Y | - |
| sco1140              | - | - | - | Y | - |
| sco1142              | - | - | - | Y | - |
| sco1150 <sup>d</sup> | - | Y | - | - | - |
| sco1153              | - | Y | - | - | - |
| sco1154              | - | - | - | Y | - |
| sco1157              | - | Y | - | - | - |
| sco1165              | - | Y | - | - | - |
| sco1172              | Y | - | - | - | - |
| sco1193              | - | Y | - | - | - |
| sco1211              | - | - | - | Y | - |
| sco1224              | - | - | - | Y | - |
| sco1240              | Y | - | - | - | - |
| sco1242              | - | - | - | Y | - |
| sco1243              | - | - | - | - | - |
| sco1248              | - | Y | - | - | - |
| sco1261              | - | Y | - | - | - |
| sco1293              | - | - | - | Y | - |
| sco1294              | - | Y | - | - | - |
| sco1297              | Y | - | - | - | - |
| sco1315              | - | Y | - | - | - |
| sco1320              | - | Y | - | - | - |
| sco1334              | - | - | - | Y | - |
| sco1335              | - | - | - | Y | - |
| sco1347              | - | - | - | - | - |
| sco1358              | - | Y | - | - | - |
| sco1394              | - | - | - | Y | - |
| sco1404              | - | Y | - | - | - |
| sco1427              | - | Y | - | - | - |
| sco1428              | - | Y | - | - | - |
| sco1451              | - | Y | - | - | - |
| sco1489              | - | - | - | Y | - |
| sco1504              | - | - | - | Y | - |

|         |   |   |   |   |   |
|---------|---|---|---|---|---|
| sco1530 | Y | - | - | - | - |
| sco1535 | Y | - | - | - | - |
| sco1542 | - | Y | - | - | - |
| sco1544 | - | Y | - | - | - |
| sco1545 | - | Y | - | - | - |
| sco1552 | - | - | - | Y | - |
| sco1562 | - | Y | - | - | - |
| sco1588 | - | - | - | Y | - |
| sco1589 | - | Y | - | - | - |
| sco1590 | - | - | - | Y | - |
| sco1602 | - | - | - | Y | - |
| sco1610 | - | Y | - | - | - |
| sco1622 | Y | - | - | - | - |
| sco1624 | Y | - | - | - | - |
| sco1625 | - | Y | - | - | - |
| sco1650 | - | Y | - | - | - |
| sco1651 | Y | - | - | - | - |
| sco1669 | Y | - | - | - | - |
| sco1671 | - | Y | - | - | - |
| sco1673 | Y | - | - | - | - |
| sco1674 | - | Y | - | - | - |
| sco1690 | - | - | - | Y | - |
| sco1698 | - | Y | - | - | - |
| sco1730 | - | Y | - | - | - |
| sco1750 | - | Y | - | - | - |
| sco1753 | - | Y | - | - | - |
| sco1757 | Y | - | - | - | - |
| sco1764 | - | - | - | Y | - |
| sco1784 | - | Y | - | - | - |
| sco1795 | - | - | Y | - | - |
| sco1796 | - | - | - | Y | - |
| sco1800 | - | - | - | Y | - |
| sco1808 | - | Y | - | - | - |
| sco1809 | - | Y | - | - | - |
| sco1813 | - | - | - | Y | - |
| sco1821 | - | - | - | - | - |
| sco1831 | - | Y | - | - | - |
| sco1832 | - | Y | - | - | - |
| sco1837 | - | Y | - | - | - |
| sco1841 | - | Y | - | - | - |
| sco1842 | - | Y | - | - | - |
| sco1859 | Y | - | - | - | - |

|                      |   |   |   |   |   |
|----------------------|---|---|---|---|---|
| sco1903              | - | Y | - | - | - |
| sco1904              | - | Y | - | - | - |
| sco1908              | - | Y | - | - | - |
| sco1909              | - | Y | - | - | - |
| sco1929              | Y | - | - | - | - |
| sco1931              | - | Y | - | - | - |
| sco1961              | - | - | - | Y | - |
| sco1966              | - | - | - | Y | - |
| sco1975              | - | Y | - | - | - |
| sco1977              | - | - | - | Y | - |
| sco1981              | - | Y | - | - | - |
| sco1988              | - | - | - | Y | - |
| sco1992              | - | Y | - | - | - |
| sco2000              | - | - | - | Y | - |
| sco2009              | - | - | - | Y | - |
| sco2012              | - | - | - | Y | - |
| sco2022              | - | Y | - | - | - |
| sco2027              | - | - | - | Y | - |
| sco2068              | - | Y | - | - | - |
| sco2077              | - | - | - | Y | - |
| sco2100              | - | - | - | Y | - |
| sco2101              | - | Y | - | - | - |
| sco2113              | - | Y | - | - | - |
| sco2114              | - | Y | - | - | - |
| sco2124              | - | Y | - | - | - |
| sco2125              | - | Y | - | - | - |
| sco2153              | Y | - | - | - | - |
| sco2157              | Y | - | - | - | - |
| sco2169              | - | - | - | Y | - |
| sco2171              | - | Y | - | - | - |
| sco2190              | - | - | - | Y | - |
| sco2204              | - | Y | - | - | - |
| sco2219              | - | - | - | Y | - |
| sco2224              | - | - | - | Y | - |
| sco2234 <sup>a</sup> | Y | - | - | - | - |
| sco2237              | - | Y | - | - | - |
| sco2238              | - | Y | - | - | - |
| sco2244              | - | - | - | Y | - |
| sco2251              | - | Y | - | - | - |
| sco2259              | - | Y | - | - | - |
| sco2260              | - | Y | - | - | - |
| sco2268              | - | Y | - | - | - |

|         |   |   |   |   |   |
|---------|---|---|---|---|---|
| sco2269 | - | - | - | Y | - |
| sco2274 | - | - | - | Y | - |
| sco2279 | - | Y | - | - | - |
| sco2293 | - | - | - | Y | - |
| sco2299 | - | Y | - | - | - |
| sco2311 | Y | - | - | - | - |
| sco2320 | - | - | - | Y | - |
| sco2331 | - | Y | - | - | - |
| sco2338 | - | Y | - | - | - |
| sco2346 | - | - | - | Y | - |
| sco2351 | - | Y | - | - | - |
| sco2357 | - | Y | - | - | - |
| sco2358 | - | Y | - | - | - |
| sco2364 | Y | Y | - | - | - |
| sco2372 | - | Y | - | - | - |
| sco2376 | - | - | - | - | - |
| sco2383 | Y | - | - | - | - |
| sco2384 | - | Y | - | - | - |
| sco2385 | - | - | - | Y | - |
| sco2438 | - | Y | - | - | - |
| sco2439 | - | Y | - | - | - |
| sco2465 | - | - | - | Y | - |
| sco2484 | - | - | - | Y | - |
| sco2497 | - | - | - | Y | - |
| sco2509 | - | Y | - | - | - |
| sco2526 | - | Y | - | - | - |
| sco2527 | - | Y | - | - | - |
| sco2540 | - | - | - | - | - |
| sco2557 | - | Y | - | - | - |
| sco2581 | - | - | Y | - | - |
| sco2583 | - | Y | - | - | - |
| sco2595 | Y | - | - | - | - |
| sco2618 | Y | - | - | - | - |
| sco2626 | - | Y | - | - | - |
| sco2634 | - | - | - | Y | - |
| sco2654 | - | Y | - | - | - |
| sco2670 | - | Y | - | - | - |
| sco2674 | - | Y | - | - | - |
| sco2685 | Y | - | - | - | - |
| sco2726 | - | - | - | Y | - |
| sco2772 | - | Y | - | - | - |
| sco2786 | - | Y | - | - | - |

|                      |   |   |   |   |   |
|----------------------|---|---|---|---|---|
| sco2789              | - | Y | - | - | - |
| sco2790              | - | Y | - | - | - |
| sco2806              | Y | - | - | - | - |
| sco2810              | Y | - | - | - | - |
| sco2823              | Y | - | - | - | - |
| sco2838              | - | Y | - | - | - |
| sco2884              | - | Y | - | - | - |
| sco2885              | - | Y | - | - | - |
| sco2888              | Y | - | - | - | - |
| sco2893              | - | Y | - | - | - |
| sco2897              | - | - | - | Y | - |
| sco2902              | - | Y | - | - | - |
| sco2906              | - | - | - | Y | - |
| sco2910              | - | - | - | Y | - |
| sco2917              | - | - | - | Y | - |
| sco2918              | - | Y | - | - | - |
| sco2919              | - | Y | - | - | - |
| sco2921              | - | Y | - | - | - |
| sco2922              | - | Y | - | - | - |
| sco2925              | - | Y | - | - | - |
| sco2926              | - | Y | - | - | - |
| sco2938              | - | - | - | Y | - |
| sco2943              | - | - | - | Y | - |
| sco2949              | - | - | - | Y | - |
| sco2975              | - | Y | - | - | - |
| sco2985              | - | Y | - | - | - |
| sco2989              | - | Y | - | - | - |
| sco3007 <sup>c</sup> | - | Y | - | - | - |
| sco3015              | Y | - | - | - | - |
| sco3017              | - | - | - | Y | - |
| sco3023              | - | - | - | Y | - |
| sco3024              | - | - | - | Y | - |
| sco3039              | - | - | - | Y | - |
| sco3043              | - | - | - | Y | - |
| sco3047              | - | Y | - | - | - |
| sco3049              | - | Y | - | - | - |
| sco3050              | - | Y | - | - | - |
| sco3052              | - | - | - | Y | - |
| sco3053              | - | Y | - | - | - |
| sco3057              | - | - | - | Y | - |
| sco3076              | - | Y | - | - | - |
| sco3080              | - | Y | - | - | - |

|                       |   |   |   |   |                              |
|-----------------------|---|---|---|---|------------------------------|
| sco3087               | - | - | - | Y | -                            |
| sco3106               | - | - | - | Y | -                            |
| sco3107               | - | Y | - | - | -                            |
| sco3118               | - | - | - | Y | -                            |
| sco3133               | - | Y | - | - | -                            |
| sco3158               | - | Y | - | - | -                            |
| sco3173               | - | - | - | Y | -                            |
| sco3175               | Y | - | - | - | -                            |
| sco3176               | - | - | - | Y | -                            |
| sco3191               | - | Y | - | - | -                            |
| sco3195               | - | Y | - | - | -                            |
| sco3196               | - | Y | - | - | -                            |
| sco3202               | Y | - | - | - | -                            |
| sco3203               | - | - | - | Y | -                            |
| sco3227               | - | Y | - | - | Calcium dependent antibiotic |
| sco3275               | - | - | - | Y | -                            |
| sco3283               | - | - | - | Y | -                            |
| sco3287 <sup>ab</sup> | - | - | - | Y | -                            |
| sco3289               | - | - | - | Y | -                            |
| sco3290               | Y | - | - | - | -                            |
| sco3291               | Y | - | - | - | -                            |
| sco3298               | - | Y | - | - | -                            |
| sco3310               | - | - | - | Y | -                            |
| sco3317 <sup>a</sup>  | Y | - | - | - | -                            |
| sco3318               | Y | - | - | - | -                            |
| sco3320               | Y | - | - | - | -                            |
| sco3321 <sup>a</sup>  | - | - | - | Y | -                            |
| sco3324               | - | Y | - | - | -                            |
| sco3325               | - | Y | - | - | -                            |
| sco3344               | - | Y | - | - | -                            |
| sco3349               | - | - | - | - | -                            |
| sco3350               | - | - | - | Y | -                            |
| sco3352               | - | Y | - | - | -                            |
| sco3360               | - | Y | - | - | -                            |
| sco3364               | - | Y | - | - | -                            |
| sco3372               | - | - | - | Y | -                            |
| sco3374               | - | Y | - | - | -                            |
| sco3394               | - | Y | - | - | -                            |
| sco3402               | - | Y | - | - | -                            |
| sco3403               | - | Y | - | - | -                            |
| sco3408               | Y | - | - | - | -                            |

|         |   |   |   |   |   |
|---------|---|---|---|---|---|
| sco3410 | - | - | - | Y | - |
| sco3413 | - | Y | - | - | - |
| sco3423 | - | Y | - | - | - |
| sco3424 | - | Y | - | - | - |
| sco3432 | - | Y | - | - | - |
| sco3433 | Y | - | - | - | - |
| sco3481 | Y | - | - | - | - |
| sco3482 | Y | - | - | - | - |
| sco3483 | Y | - | - | - | - |
| sco3487 | Y | - | - | - | - |
| sco3497 | - | - | - | Y | - |
| sco3503 | - | - | - | Y | - |
| sco3505 | - | - | - | Y | - |
| sco3535 | - | - | - | Y | - |
| sco3536 | - | Y | - | - | - |
| sco3550 | - | - | Y | - | - |
| sco3559 | - | - | - | Y | - |
| sco3560 | Y | - | - | - | - |
| sco3567 | - | - | - | Y | - |
| sco3572 | - | Y | - | - | - |
| sco3578 | - | Y | - | - | - |
| sco3579 | - | - | - | Y | - |
| sco3602 | - | - | - | - | - |
| sco3606 | - | Y | - | - | - |
| sco3620 | Y | - | - | - | - |
| sco3621 | - | - | - | Y | - |
| sco3624 | - | Y | - | - | - |
| sco3636 | - | - | - | Y | - |
| sco3638 | - | - | - | Y | - |
| sco3665 | - | - | - | Y | - |
| sco3671 | Y | - | - | - | - |
| sco3693 | - | Y | - | - | - |
| sco3712 | - | Y | - | - | - |
| sco3713 | - | Y | - | - | - |
| sco3734 | - | Y | - | - | - |
| sco3769 | - | Y | - | - | - |
| sco3793 | - | Y | - | - | - |
| sco3794 | - | Y | - | - | - |
| sco3825 | - | Y | - | - | - |
| sco3832 | - | Y | - | - | - |
| sco3836 | - | Y | - | - | - |
| sco3855 | - | Y | - | - | - |



|         |   |   |   |   |   |
|---------|---|---|---|---|---|
| sco3902 | - | Y | - | - | - |
| sco3910 | - | - | - | Y | - |
| sco3920 | - | - | - | Y | - |
| sco3927 | - | Y | - | - | - |
| sco3939 | - | Y | - | - | - |
| sco3941 | Y | - | - | - | - |
| sco3942 | - | - | - | Y | - |
| sco3949 | - | Y | - | - | - |
| sco3960 | - | - | - | Y | - |
| sco3973 | - | - | - | Y | - |
| sco3976 | - | - | - | - | - |
| sco3989 | Y | - | - | - | - |
| sco3991 | - | - | - | Y | - |
| sco4008 | - | - | - | Y | - |
| sco4014 | - | Y | - | - | - |
| sco4025 | - | Y | - | - | - |
| sco4034 | - | - | - | Y | - |
| sco4038 | Y | - | - | - | - |
| sco4041 | - | - | - | Y | - |
| sco4042 | - | Y | - | - | - |
| sco4056 | - | Y | - | - | - |
| sco4057 | - | - | - | Y | - |
| sco4079 | - | - | - | Y | - |
| sco4080 | - | Y | - | - | - |
| sco4087 | - | Y | - | - | - |
| sco4088 | - | Y | - | - | - |
| sco4090 | - | - | - | Y | - |
| sco4118 | Y | - | - | - | - |
| sco4134 | - | Y | - | - | - |
| sco4135 | - | Y | - | - | - |
| sco4136 | - | - | - | Y | - |
| sco4137 | Y | - | - | - | - |
| sco4164 | Y | - | - | - | - |
| sco4172 | - | Y | - | - | - |
| sco4182 | - | Y | - | - | - |
| sco4183 | - | - | - | Y | - |
| sco4186 | - | Y | - | - | - |
| sco4188 | - | - | - | Y | - |
| sco4201 | Y | - | - | - | - |
| sco4206 | - | - | - | Y | - |
| sco4223 | - | - | - | Y | - |
| sco4232 | - | - | - | Y | - |

|                      |   |   |   |   |   |
|----------------------|---|---|---|---|---|
| sco4259              | - | - | - | Y | - |
| sco4261 <sup>a</sup> | Y | - | - | - | - |
| sco4262              | Y | - | - | - | - |
| sco4264              | - | - | - | Y | - |
| sco4269              | - | - | - | Y | - |
| sco4279              | - | Y | - | - | - |
| sco4283 <sup>d</sup> | - | Y | - | - | - |
| sco4290              | - | Y | - | - | - |
| sco4298              | - | Y | - | - | - |
| sco4299              | - | Y | - | - | - |
| sco4310              | - | Y | - | - | - |
| sco4316              | - | - | - | Y | - |
| sco4317              | - | - | - | Y | - |
| sco4318              | - | Y | - | - | - |
| sco4323              | - | Y | - | - | - |
| sco4324              | - | - | - | Y | - |
| sco4325              | - | Y | - | - | - |
| sco4326              | - | Y | - | - | - |
| sco4334              | - | Y | - | - | - |
| sco4358              | - | - | - | Y | - |
| sco4365              | - | Y | - | - | - |
| sco4371              | Y | - | - | - | - |
| sco4388              | - | - | - | Y | - |
| sco4401              | - | Y | - | - | - |
| sco4407              | - | Y | - | - | - |
| sco4413              | - | - | - | Y | - |
| sco4424              | - | Y | - | - | - |
| sco4425 <sup>c</sup> | - | Y | - | - | - |
| sco4426              | - | - | - | Y | - |
| sco4430              | - | Y | - | - | - |
| sco4431              | - | Y | - | - | - |
| sco4440              | Y | - | - | - | - |
| sco4443              | - | Y | - | - | - |
| sco4447              | - | - | - | Y | - |
| sco4474              | - | - | - | Y | - |
| sco4488              | - | Y | - | - | - |
| sco4489              | - | - | - | Y | - |
| sco4511              | - | Y | - | - | - |
| sco4524              | Y | - | - | - | - |
| sco4536              | Y | - | - | - | - |
| sco4537              | Y | - | - | - | - |
| sco4557              | - | Y | - | - | - |

|                      |   |   |   |   |   |
|----------------------|---|---|---|---|---|
| sco4560              | - | - | - | Y | - |
| sco4564              | Y | - | - | - | - |
| sco4565              | Y | - | - | - | - |
| sco4566 <sup>a</sup> | Y | - | - | - | - |
| sco4567 <sup>a</sup> | Y | - | - | - | - |
| sco4579              | - | - | - | Y | - |
| sco4588              | - | Y | - | - | - |
| sco4589              | - | Y | - | - | - |
| sco4591              | - | Y | - | - | - |
| sco4602              | Y | - | - | - | - |
| sco4603              | Y | - | - | - | - |
| sco4604              | Y | - | - | - | - |
| sco4605              | Y | - | - | - | - |
| sco4606              | Y | - | - | - | - |
| sco4607              | Y | - | - | - | - |
| sco4613              | - | Y | - | - | - |
| sco4614              | - | Y | - | - | - |
| sco4632              | - | - | - | Y | - |
| sco4657              | - | - | - | Y | - |
| sco4662              | - | - | - | Y | - |
| sco4680              | - | Y | - | - | - |
| sco4692 <sup>a</sup> | - | - | - | Y | - |
| sco4693 <sup>a</sup> | Y | - | - | - | - |
| sco4699 <sup>a</sup> | - | - | - | Y | - |
| sco4702              | - | - | - | Y | - |
| sco4721              | - | - | - | Y | - |
| sco4731              | - | Y | - | - | - |
| sco4737              | - | - | - | Y | - |
| sco4749 <sup>d</sup> | - | Y | - | - | - |
| sco4761              | Y | - | - | - | - |
| sco4772              | - | - | - | - | - |
| sco4773              | - | Y | - | - | - |
| sco4789              | - | Y | - | - | - |
| sco4792              | - | Y | - | - | - |
| sco4793              | - | Y | - | - | - |
| sco4794              | - | - | - | Y | - |
| sco4795              | - | - | - | Y | - |
| sco4801              | - | Y | - | - | - |
| sco4811              | - | - | - | Y | - |
| sco4825              | Y | - | - | - | - |
| sco4829              | Y | - | - | - | - |
| sco4840              | - | Y | - | - | - |

|                      |   |   |   |   |              |
|----------------------|---|---|---|---|--------------|
| sco4841              | - | Y | - | - | -            |
| sco4846              | - | Y | - | - | -            |
| sco4848              | Y | - | - | - | -            |
| sco4872              | - | - | - | Y | -            |
| sco4909              | - | - | - | Y | -            |
| sco4912              | - | Y | - | - | -            |
| sco4921              | - | - | - | Y | -            |
| sco4928              | - | Y | - | - | -            |
| sco4929              | - | Y | - | - | -            |
| sco4933              | - | - | - | Y | -            |
| sco4953              | - | Y | - | - | -            |
| sco4957              | - | - | - | Y | -            |
| sco4960              | - | - | - | Y | -            |
| sco4965              | Y | - | - | - | -            |
| sco4969              | - | - | - | Y | -            |
| sco4975              | - | - | - | Y | -            |
| sco4995              | - | Y | - | - | -            |
| sco5049              | - | Y | - | - | -            |
| sco5054              | - | Y | - | - | -            |
| sco5060              | - | Y | - | - | -            |
| sco5062              | - | - | - | Y | -            |
| sco5063              | - | - | - | Y | -            |
| sco5073              | Y | - | - | - | Actinorhodin |
| sco5080              | Y | - | - | - | Actinorhodin |
| sco5081              | - | Y | - | - | Actinorhodin |
| sco5082              | - | Y | - | - | Actinorhodin |
| sco5099              | Y | - | - | - | -            |
| sco5106 <sup>d</sup> | - | Y | - | - | -            |
| sco5121              | Y | - | - | Y | -            |
| sco5123              | - | Y | - | - | -            |
| sco5124              | - | Y | - | - | -            |
| sco5125              | - | Y | - | - | -            |
| sco5134              | - | - | - | Y | -            |
| sco5138              | - | - | - | - | -            |
| sco5143              | - | - | - | Y | -            |
| sco5146 <sup>d</sup> | - | Y | - | - | -            |
| sco5151              | - | Y | - | - | -            |
| sco5152              | - | Y | - | - | -            |
| sco5155              | - | Y | - | - | -            |
| sco5164              | - | Y | - | - | -            |
| sco5167              | - | Y | - | - | -            |
| sco5168              | - | Y | - | - | -            |

|         |   |   |   |   |               |
|---------|---|---|---|---|---------------|
| sco5177 | - | - | - | Y | -             |
| sco5178 | - | Y | - | - | -             |
| sco5182 | - | - | - | Y | -             |
| sco5183 | - | - | - | Y | -             |
| sco5197 | - | Y | - | - | -             |
| sco5198 | - | Y | - | - | -             |
| sco5200 | - | - | Y | - | -             |
| sco5202 | - | Y | - | - | -             |
| sco5203 | - | - | Y | Y | -             |
| sco5209 | - | - | - | Y | -             |
| sco5223 | - | Y | - | - | Albaflavenone |
| sco5224 | - | - | - | Y | -             |
| sco5241 | Y | - | - | - | -             |
| sco5242 | - | Y | - | - | -             |
| sco5243 | - | - | - | Y | -             |
| sco5255 | - | Y | - | - | -             |
| sco5256 | - | Y | - | - | -             |
| sco5294 | - | Y | - | - | -             |
| sco5329 | Y | - | - | - | -             |
| sco5330 | - | Y | - | - | -             |
| sco5333 | - | Y | - | - | -             |
| sco5334 | - | - | - | Y | -             |
| sco5356 | - | - | - | Y | -             |
| sco5380 | - | - | - | Y | -             |
| sco5389 | - | - | - | Y | -             |
| sco5390 | - | Y | - | - | -             |
| sco5392 | - | - | - | Y | -             |
| sco5398 | Y | - | - | - | -             |
| sco5410 | - | - | - | Y | -             |
| sco5411 | - | - | - | Y | -             |
| sco5418 | - | - | - | Y | -             |
| sco5422 | - | - | - | Y | -             |
| sco5427 | - | Y | - | - | -             |
| sco5445 | - | - | - | Y | -             |
| sco5465 | - | Y | - | - | -             |
| sco5466 | - | Y | - | - | -             |
| sco5488 | - | Y | - | - | -             |
| sco5489 | - | Y | - | - | -             |
| sco5506 | - | - | - | Y | -             |
| sco5507 | - | Y | - | - | -             |
| sco5516 | - | - | - | Y | -             |
| sco5518 | - | - | - | Y | -             |

|         |   |   |   |   |             |
|---------|---|---|---|---|-------------|
| sco5543 | Y | - | - | - | -           |
| sco5545 | Y | - | - | - | -           |
| sco5558 | Y | - | - | - | -           |
| sco5561 | - | Y | - | - | -           |
| sco5573 | - | Y | - | - | -           |
| sco5576 | - | - | - | Y | -           |
| sco5581 | - | Y | - | - | -           |
| sco5630 | - | - | - | Y | -           |
| sco5641 | - | - | - | Y | -           |
| sco5650 | - | - | - | Y | -           |
| sco5661 | Y | - | - | - | -           |
| sco5664 | - | Y | - | - | -           |
| sco5706 | - | - | - | Y | -           |
| sco5709 | - | - | - | Y | -           |
| sco5722 | - | Y | - | - | -           |
| sco5727 | - | Y | - | - | -           |
| sco5760 | - | Y | - | - | -           |
| sco5781 | - | Y | - | - | -           |
| sco5782 | - | - | - | Y | -           |
| sco5788 | - | - | - | Y | -           |
| sco5802 | - | - | - | Y | -           |
| sco5810 | - | - | - | Y | -           |
| sco5814 | - | Y | - | - | -           |
| sco5821 | - | - | - | Y | -           |
| sco5828 | - | Y | - | - | -           |
| sco5835 | - | Y | - | - | -           |
| sco5841 | - | - | - | Y | -           |
| sco5842 | Y | - | - | - | -           |
| sco5856 | - | Y | - | - | -           |
| sco5866 | - | Y | - | - | -           |
| sco5897 | Y | - | - | - | Prodiginine |
| sco5986 | - | Y | - | - | -           |
| sco5988 | - | Y | - | - | -           |
| sco5989 | - | - | - | Y | -           |
| sco6002 | - | Y | - | - | -           |
| sco6003 | - | - | - | Y | -           |
| sco6029 | Y | - | - | - | -           |
| sco6039 | - | - | - | Y | -           |
| sco6042 | - | Y | - | - | -           |
| sco6043 | - | Y | - | - | -           |
| sco6066 | - | - | - | Y | -           |
| sco6077 | - | Y | - | - | -           |

|                      |   |   |   |   |           |
|----------------------|---|---|---|---|-----------|
| sco6085              | - | Y | - | - | -         |
| sco6093              | - | - | - | Y | -         |
| sco6106              | - | - | - | Y | -         |
| sco6127              | - | Y | - | - | -         |
| sco6156              | - | - | - | Y | -         |
| sco6196              | - | Y | - | - | -         |
| sco6222              | - | Y | - | - | -         |
| sco6246              | - | - | - | - | -         |
| sco6265              | - | - | - | Y | -         |
| sco6266              | Y | - | - | - | SCB1      |
| sco6268              | - | Y | - | - | -         |
| sco6271              | - | - | - | Y | -         |
| sco6273              | - | - | - | - | yCPK      |
| sco6274              | - | - | - | Y | yCPK      |
| sco6277 <sup>d</sup> | Y | - | - | - | yCPK      |
| sco6281              | Y | - | - | - | yCPK      |
| sco6284              | - | - | - | Y | yCPK      |
| sco6285              | - | - | - | Y | yCPK      |
| sco6311              | - | - | - | Y | -         |
| sco6312              | - | - | - | Y | -         |
| sco6373              | Y | - | - | - | -         |
| sco6375              | Y | - | - | - | -         |
| sco6377              | - | - | - | Y | -         |
| sco6390              | - | - | - | Y | -         |
| sco6393              | Y | - | - | - | -         |
| sco6394              | Y | - | - | - | -         |
| sco6396              | - | - | - | Y | -         |
| sco6422              | - | Y | - | - | -         |
| sco6438              | - | Y | - | - | Dipeptide |
| sco6455              | - | Y | - | - | -         |
| sco6477              | - | - | - | Y | -         |
| sco6492              | - | Y | - | - | -         |
| sco6598              | Y | - | - | - | -         |
| sco6624 <sup>c</sup> | Y | - | - | - | -         |
| sco6636              | - | Y | - | - | -         |
| sco6646              | - | Y | - | - | -         |
| sco6654              | - | - | - | Y | -         |
| sco6704              | - | - | - | Y | -         |
| sco6715              | Y | - | - | - | -         |
| sco6716 <sup>d</sup> | - | Y | - | - | -         |
| sco6717              | - | Y | - | - | -         |
| sco6721 <sup>a</sup> | - | - | - | Y | -         |

|                      |   |   |   |   |        |
|----------------------|---|---|---|---|--------|
| sco6723              | - | - | - | Y | -      |
| sco6725              | - | Y | - | - | -      |
| sco6729 <sup>d</sup> | - | Y | - | - | -      |
| sco6733              | - | - | - | Y | -      |
| sco6735              | - | Y | - | - | -      |
| sco6736              | - | - | - | - | -      |
| sco6740              | - | Y | - | - | -      |
| sco6742              | - | Y | - | - | -      |
| sco6749              | - | Y | - | - | -      |
| sco6760              | - | - | - | Y | Hopene |
| sco6761              | Y | - | - | - | Hopene |
| sco6762              | Y | - | - | - | Hopene |
| sco6770              | - | - | - | Y | Hopene |
| sco6771              | - | Y | - | - |        |
| sco6772              | - | Y | - | - | -      |
| sco6775              | Y | - | - | - | -      |
| sco6777              | - | Y | - | - | -      |
| sco6828              | - | - | - | Y | -      |
| sco6861              | - | - | - | Y | -      |
| sco6947              | - | - | - | Y | -      |
| sco6949              | - | - | - | Y | -      |
| sco6998              | - | Y | - | - | -      |
| sco7009              | - | Y | - | - | -      |
| sco7022              | Y | - | - | - | -      |
| sco7047              | - | - | - | Y | -      |
| sco7101              | - | - | - | Y | -      |
| sco7173              | - | - | - | Y | -      |
| sco7219              | - | - | - | Y | -      |
| sco7234              | - | - | - | Y | -      |
| sco7249              | - | Y | - | - | -      |
| sco7250              | - | Y | - | - | -      |
| sco7252              | - | - | - | - | -      |
| sco7253              | - | Y | - | - | -      |
| sco7258              | - | Y | - | - | -      |
| sco7268              | - | Y | - | - | -      |
| sco7300              | - | Y | - | - | -      |
| sco7343              | - | Y | - | - | -      |
| sco7455              | - | - | - | Y | -      |
| sco7456              | - | - | - | Y | -      |
| sco7480              | - | Y | - | - | -      |
| sco7603              | - | - | - | Y | -      |
| sco7605              | - | Y | - | - | -      |



|         |   |   |   |   |            |
|---------|---|---|---|---|------------|
| sco7652 | - | Y | - | - | -          |
| sco7653 | - | - | - | Y | -          |
| sco7716 | - | Y | - | - | -          |
| sco7717 | Y | - | - | - | -          |
| sco7718 | - | - | - | Y | -          |
| sco7757 | - | - | - | Y | -          |
| sco7835 | - | - | - | Y | -          |
|         |   |   |   |   |            |
| sav0047 | - | - | - | Y | -          |
| sav0112 | - | - | - | Y | -          |
| sav0164 | - | - | - | Y | -          |
| sav0193 | - | - | - | Y | -          |
| sav0200 | - | - | - | Y | -          |
| sav0220 | - | - | - | Y | -          |
| sav0234 | - | - | - | Y | -          |
| sav0243 | - | - | - | Y | -          |
| sav0244 | - | - | - | Y | -          |
| sav0247 | - | - | - | Y | -          |
| sav0259 | - | - | - | Y | Microcin   |
| sav0263 | - | - | - | Y | -          |
| sav0272 | - | - | - | Y | -          |
| sav0274 | - | - | - | Y | -          |
| sav0277 | - | - | - | Y | -          |
| sav0334 | - | - | - | Y | -          |
| sav0410 | Y | Y | - | - | -          |
| sav0435 | - | - | - | Y | -          |
| sav0514 | - | - | - | Y | -          |
| sav0541 | - | - | - | Y | -          |
| sav0573 | - | - | - | Y | -          |
| sav0675 | - | - | - | Y | -          |
| sav0749 | - | - | - | Y | -          |
| sav0779 | - | - | - | Y | -          |
| sav0783 | - | - | - | Y | -          |
| sav0784 | - | - | - | Y | -          |
| sav0824 | - | - | - | Y | -          |
| sav0825 | - | - | - | Y | -          |
| sav0886 | - | - | - | Y | -          |
| sav0896 | - | - | - | Y | -          |
| sav0897 | - | - | - | Y | -          |
| sav0935 | - | Y | - | - | Avermectin |
| sav0936 | Y | Y | - | - | Avermectin |
| sav0937 | Y | - | - | - | Avermectin |

|         |   |   |   |   |            |
|---------|---|---|---|---|------------|
| sav0938 | - | - | - | Y | Avermectin |
| sav0939 | - | - | - | Y | Avermectin |
| sav0942 | - | - | - | Y | Avermectin |
| sav0945 | - | Y | - | - | Avermectin |
| sav0946 | - | Y | - | - | Avermectin |
| sav0948 | - | - | - | Y | Avermectin |
| sav0949 | - | Y | - | - | Avermectin |
| sav0962 | - | - | - | Y | -          |
| sav0980 | - | - | - | Y | -          |
| sav1016 | - | - | - | Y | -          |
| sav1043 | - | - | - | Y | -          |
| sav1047 | - | - | - | Y | -          |
| sav1048 | Y | Y | - | - | -          |
| sav1060 | - | - | - | Y | -          |
| sav1083 | - | - | - | Y | -          |
| sav1090 | Y | - | - | - | -          |
| sav1092 | - | Y | - | - | -          |
| sav1100 | - | - | - | Y | -          |
| sav1104 | - | - | - | Y | -          |
| sav1111 | - | - | - | Y | -          |
| sav1118 | - | - | - | Y | -          |
| sav1138 | - | Y | - | - | -          |
| sav1161 | - | - | - | Y | -          |
| sav1162 | - | Y | - | - | -          |
| sav1164 | - | - | - | Y | -          |
| sav1187 | - | - | - | Y | -          |
| sav1235 | - | Y | - | - | -          |
| sav1236 | - | Y | - | - | -          |
| sav1237 | - | - | - | Y | -          |
| sav1238 | - | Y | - | - | -          |
| sav1247 | - | - | - | Y | -          |
| sav1300 | - | - | - | Y | -          |
| sav1308 | - | - | - | Y | -          |
| sav1332 | - | - | - | Y | -          |
| sav1410 | - | - | - | Y | -          |
| sav1423 | - | - | - | Y | -          |
| sav1463 | - | - | - | Y | -          |
| sav1486 | - | Y | - | - | -          |
| sav1502 | - | - | - | Y | -          |
| sav1526 | - | - | - | Y | -          |
| sav1572 | - | - | - | Y | -          |
| sav1574 | - | - | - | Y | -          |

|         |   |   |   |   |                                                 |
|---------|---|---|---|---|-------------------------------------------------|
| sav1578 | - | - | - | Y | -                                               |
| sav1589 | - | Y | - | - | -                                               |
| sav1635 | - | - | - | Y | -                                               |
| sav1642 | - | Y | - | - | -                                               |
| sav1644 | - | - | - | Y | -                                               |
| sav1652 | Y | - | - | - | Hopene                                          |
| sav1663 | - | Y | - | - | -                                               |
| sav1664 | - | - | - | Y | -                                               |
| sav1676 | Y | - | - | - | -                                               |
| sav1684 | - | - | - | Y | -                                               |
| sav1692 | - | - | - | Y | -                                               |
| sav1704 | - | - | - | Y | -                                               |
| sav1705 | - | - | - | Y | -                                               |
| sav1792 | - | - | - | Y | -                                               |
| sav1799 | - | - | - | Y | -                                               |
| sav1837 | - | Y | - | - | -                                               |
| sav1895 | - | Y | - | - | -                                               |
| sav1939 | - | - | - | Y | -                                               |
| sav1956 | - | - | - | Y | -                                               |
| sav1959 | - | - | - | Y | -                                               |
| sav2001 | - | - | - | Y | -                                               |
| sav2034 | - | - | - | Y | -                                               |
| sav2048 | - | - | - | Y | -                                               |
| sav2061 | - | - | - | Y | -                                               |
| sav2075 | - | - | - | Y | -                                               |
| sav2085 | - | - | - | Y | -                                               |
| sav2089 | - | - | - | Y | -                                               |
| sav2116 | - | - | - | Y | -                                               |
| sav2160 | - | - | - | Y | -                                               |
| sav2169 | - | - | - | Y | -                                               |
| sav2203 | - | - | - | Y | -                                               |
| sav2220 | - | - | - | Y | -                                               |
| sav2225 | - | - | - | Y | -                                               |
| sav2227 | - | - | - | Y | -                                               |
| sav2232 | - | - | - | Y | -                                               |
| sav2261 | - | - | - | Y | -                                               |
| sav2268 | - | - | - | Y | 2-alkyl-4-hydroxymethylfuran-3-carboxylic acids |
| sav2272 | - | Y | - | - | -                                               |
| sav2325 | - | Y | - | - | -                                               |
| sav2326 | - | - | - | Y | -                                               |

|         |   |   |   |   |                     |
|---------|---|---|---|---|---------------------|
| sav2363 | - | - | - | Y | -                   |
| sav2382 | - | - | - | Y | Aromatic polyketide |
| sav2406 | - | - | - | Y | -                   |
| sav2410 | - | - | - | Y | -                   |
| sav2417 | Y | - | - | - | -                   |
| sav2424 | - | - | - | Y | -                   |
| sav2435 | - | - | - | Y | -                   |
| sav2446 | - | - | - | Y | -                   |
| sav2451 | - | - | - | Y | -                   |
| sav2456 | - | - | - | Y | -                   |
| sav2464 | - | - | - | Y | -                   |
| sav2490 | - | - | - | Y | -                   |
| sav2539 | - | - | - | Y | -                   |
| sav2551 | Y | - | - | - | -                   |
| sav2565 | - | - | - | Y | -                   |
| sav2574 | - | - | - | Y | -                   |
| sav2628 | - | - | - | Y | -                   |
| sav2653 | - | - | - | Y | -                   |
| sav2677 | - | - | - | Y | -                   |
| sav2678 | - | - | - | Y | -                   |
| sav2693 | Y | - | - | - | -                   |
| sav2719 | - | - | - | Y | -                   |
| sav2738 | - | - | - | Y | -                   |
| sav2770 | - | - | - | Y | -                   |
| sav2797 | - | - | - | Y | -                   |
| sav2799 | - | Y | - | - | -                   |
| sav2821 | - | Y | - | - | -                   |
| sav2822 | - | - | - | Y | -                   |
| sav2829 | - | - | - | Y | -                   |
| sav2831 | - | - | - | Y | -                   |
| sav2854 | - | - | - | Y | -                   |
| sav2865 | - | Y | - | - | -                   |
| sav2866 | - | Y | - | - | -                   |
| sav2875 | - | - | - | Y | -                   |
| sav2906 | - | - | - | Y | -                   |
| sav2918 | Y | - | - | - | -                   |
| sav2933 | - | Y | - | - | -                   |
| sav2957 | - | - | - | Y | -                   |
| sav2970 | - | - | - | Y | -                   |
| sav2971 | - | - | - | Y | -                   |
| sav2985 | Y | - | - | - | -                   |
| sav2986 | - | Y | - | - | -                   |

|         |   |   |   |   |                       |
|---------|---|---|---|---|-----------------------|
| sav2987 | - | - | - | Y | -                     |
| sav2988 | - | Y | - | - | -                     |
| sav3014 | - | - | - | Y | -                     |
| sav3050 | - | Y | - | - | -                     |
| sav3051 | - | - | - | Y | -                     |
| sav3074 | - | - | - | Y | -                     |
| sav3082 | - | - | - | Y | -                     |
| sav3097 | - | - | - | Y | -                     |
| sav3119 | Y | - | - | - | -                     |
| sav3123 | - | - | - | Y | -                     |
| sav3142 | - | Y | - | - | -                     |
| sav3143 | - | - | - | Y | -                     |
| sav3147 | - | - | - | Y | -                     |
| sav3148 | - | - | - | Y | -                     |
| sav3149 | - | - | - | Y | -                     |
| sav3164 | Y | - | - | - | Non-ribosomal peptide |
| sav3165 | Y | - | - | - | -                     |
| sav3167 | - | - | - | Y | -                     |
| sav3168 | - | Y | - | - | -                     |
| sav3198 | Y | - | - | - | Non-ribosomal peptide |
| sav3208 | - | - | - | Y | -                     |
| sav3214 | Y | - | - | - | -                     |
| sav3215 | Y | - | - | - | -                     |
| sav3265 | - | - | - | Y | -                     |
| sav3291 | - | - | - | Y | -                     |
| sav3297 | - | Y | - | - | -                     |
| sav3299 | Y | - | - | - | -                     |
| sav3306 | - | Y | - | - | -                     |
| sav3310 | - | Y | - | - | -                     |
| sav3315 | - | - | - | Y | -                     |
| sav3328 | - | - | - | Y | -                     |
| sav3335 | - | - | - | Y | -                     |
| sav3336 | - | - | - | Y | -                     |
| sav3338 | - | - | - | Y | -                     |
| sav3355 | - | - | - | Y | -                     |
| sav3364 | - | - | - | Y | -                     |
| sav3407 | - | - | - | Y | -                     |
| sav3429 | - | - | - | Y | -                     |
| sav3447 | - | - | - | Y | -                     |
| sav3459 | - | Y | - | - | -                     |

|         |   |   |   |   |   |
|---------|---|---|---|---|---|
| sav3462 | - | Y | - | - | - |
| sav3465 | - | - | - | Y | - |
| sav3469 | - | - | - | Y | - |
| sav3478 | - | - | - | Y | - |
| sav3492 | - | - | - | Y | - |
| sav3493 | Y | - | - | - | - |
| sav3494 | - | - | - | Y | - |
| sav3502 | - | - | - | Y | - |
| sav3503 | - | - | - | Y | - |
| sav3513 | - | - | - | Y | - |
| sav3547 | - | - | - | Y | - |
| sav3559 | - | - | - | Y | - |
| sav3571 | - | Y | - | - | - |
| sav3580 | - | - | - | Y | - |
| sav3596 | - | - | - | Y | - |
| sav3597 | - | - | - | Y | - |
| sav3626 | - | Y | - | - | - |
| sav3673 | - | - | - | Y | - |
| sav3682 | - | - | - | Y | - |
| sav3687 | - | - | - | Y | - |
| sav3695 | Y | - | - | - | - |
| sav3702 | - | Y | - | - | - |
| sav3703 | - | Y | - | - | - |
| sav3711 | - | - | - | Y | - |
| sav3714 | - | - | - | Y | - |
| sav3730 | - | - | - | Y | - |
| sav3775 | - | - | - | Y | - |
| sav3783 | Y | - | - | - | - |
| sav3790 | - | - | - | Y | - |
| sav3794 | - | Y | - | - | - |
| sav3806 | - | - | - | Y | - |
| sav3841 | - | - | - | Y | - |
| sav3848 | - | - | - | Y | - |
| sav3853 | - | - | - | Y | - |
| sav3860 | - | - | - | Y | - |
| sav3889 | - | - | - | Y | - |
| sav3897 | - | Y | - | - | - |
| sav3906 | - | Y | - | - | - |
| sav3910 | - | - | - | Y | - |
| sav3913 | - | - | - | Y | - |
| sav3931 | - | - | - | Y | - |
| sav3936 | - | - | - | Y | - |

|         |   |   |   |   |   |
|---------|---|---|---|---|---|
| sav3942 | - | Y | - | - | - |
| sav3965 | Y | - | - | - | - |
| sav3970 | - | - | - | Y | - |
| sav3982 | - | - | - | Y | - |
| sav3983 | - | - | - | Y | - |
| sav4024 | - | - | - | Y | - |
| sav4048 | - | - | - | Y | - |
| sav4054 | - | - | - | Y | - |
| sav4059 | - | - | - | Y | - |
| sav4077 | Y | - | - | - | - |
| sav4078 | - | Y | - | - | - |
| sav4081 | - | - | - | Y | - |
| sav4111 | - | - | - | Y | - |
| sav4133 | - | Y | - | - | - |
| sav4134 | - | - | - | Y | - |
| sav4177 | - | - | - | Y | - |
| sav4181 | - | - | - | Y | - |
| sav4185 | - | - | - | Y | - |
| sav4187 | - | - | - | Y | - |
| sav4193 | - | Y | - | - | - |
| sav4235 | Y | - | - | - | - |
| sav4266 | - | Y | - | - | - |
| sav4275 | - | Y | - | - | - |
| sav4277 | - | - | - | Y | - |
| sav4326 | - | - | - | Y | - |
| sav4328 | Y | - | - | - | - |
| sav4349 | - | - | - | Y | - |
| sav4357 | - | - | - | Y | - |
| sav4361 | - | - | - | Y | - |
| sav4367 | Y | - | - | - | - |
| sav4369 | - | - | - | Y | - |
| sav4387 | - | - | - | Y | - |
| sav4397 | - | - | - | Y | - |
| sav4398 | - | - | - | Y | - |
| sav4401 | - | - | - | Y | - |
| sav4421 | - | - | - | Y | - |
| sav4428 | - | - | - | Y | - |
| sav4429 | - | - | - | Y | - |
| sav4435 | - | Y | - | - | - |
| sav4437 | - | - | - | Y | - |
| sav4489 | - | - | - | Y | - |
| sav4510 | - | Y | - | - | - |

|         |   |   |   |   |   |
|---------|---|---|---|---|---|
| sav4516 | - | - | - | Y | - |
| sav4548 | - | - | - | Y | - |
| sav4554 | - | Y | - | - | - |
| sav4563 | - | Y | - | - | - |
| sav4585 | - | Y | - | - | - |
| sav4590 | - | - | - | Y | - |
| sav4595 | - | - | - | Y | - |
| sav4601 | - | - | - | Y | - |
| sav4613 | - | - | - | Y | - |
| sav4626 | - | - | - | Y | - |
| sav4625 | - | - | - | Y | - |
| sav4662 | Y | - | - | - | - |
| sav4667 | - | - | - | Y | - |
| sav4668 | - | - | - | Y | - |
| sav4679 | - | - | - | Y | - |
| sav4696 | - | - | - | Y | - |
| sav4712 | - | Y | - | - | - |
| sav4733 | - | - | - | Y | - |
| sav4737 | - | - | - | Y | - |
| sav4738 | Y | - | - | - | - |
| sav4739 | - | - | - | Y | - |
| sav4740 | Y | - | - | - | - |
| sav4741 | Y | - | - | - | - |
| sav4743 | - | - | - | Y | - |
| sav4745 | - | - | - | Y | - |
| sav4754 | - | - | - | Y | - |
| sav4757 | - | - | - | Y | - |
| sav4762 | - | - | - | Y | - |
| sav4782 | - | - | - | Y | - |
| sav4783 | - | - | - | Y | - |
| sav4792 | - | - | - | Y | - |
| sav4794 | - | - | - | Y | - |
| sav4795 | - | - | - | Y | - |
| sav4819 | - | - | - | Y | - |
| sav4823 | - | - | - | Y | - |
| sav4835 | - | Y | - | - | - |
| sav4840 | Y | - | - | - | - |
| sav4841 | Y | - | - | - | - |
| sav4842 | Y | - | - | - | - |
| sav4843 | Y | - | - | - | - |
| sav4852 | - | - | - | Y | - |
| sav4886 | Y | - | - | - | - |



|         |   |   |   |   |   |
|---------|---|---|---|---|---|
| sav4889 | Y | - | - | - | - |
| sav4894 | - | - | - | Y | - |
| sav4895 | - | - | - | Y | - |
| sav4905 | - | - | - | Y | - |
| sav4955 | - | Y | - | - | - |
| sav4960 | - | - | - | Y | - |
| sav4971 | - | - | - | Y | - |
| sav5004 | - | - | - | Y | - |
| sav5024 | - | - | - | Y | - |
| sav5025 | Y | - | - | - | - |
| sav5053 | - | - | - | Y | - |
| sav5054 | - | - | - | Y | - |
| sav5059 | - | - | - | Y | - |
| sav5061 | - | - | - | Y | - |
| sav5068 | - | - | - | Y | - |
| sav5069 | - | - | - | - | - |
| sav5085 | - | - | - | Y | - |
| sav5117 | - | - | - | Y | - |
| sav5164 | - | Y | - | - | - |
| sav5180 | - | - | - | Y | - |
| sav5188 | - | Y | - | - | - |
| sav5189 | - | - | - | Y | - |
| sav5190 | - | - | - | Y | - |
| sav5231 | - | - | - | Y | - |
| sav5240 | Y | - | - | - | - |
| sav5245 | - | - | - | Y | - |
| sav5246 | - | - | - | Y | - |
| sav5268 | - | Y | - | - | - |
| sav5293 | - | - | - | Y | - |
| sav5304 | - | - | - | Y | - |
| sav5305 | - | - | - | Y | - |
| sav5363 | Y | - | - | - | - |
| sav5369 | - | Y | - | - | - |
| sav5371 | - | - | - | Y | - |
| sav5379 | - | - | - | Y | - |
| sav5407 | Y | - | - | - | - |
| sav5412 | - | - | - | Y | - |
| sav5439 | - | - | - | Y | - |
| sav5444 | Y | - | - | - | - |
| sav5475 | - | - | - | Y | - |
| sav5483 | - | - | - | Y | - |
| sav5485 | - | - | - | Y | - |

|         |   |   |   |   |   |
|---------|---|---|---|---|---|
| sav5489 | - | - | - | Y | - |
| sav5494 | - | Y | - | - | - |
| sav5525 | - | - | - | Y | - |
| sav5548 | - | Y | - | - | - |
| sav5587 | - | - | - | Y | - |
| sav5592 | - | - | - | Y | - |
| sav5596 | - | - | - | Y | - |
| sav5624 | - | - | - | Y | - |
| sav5638 | - | Y | - | - | - |
| sav5650 | - | Y | - | - | - |
| sav5679 | - | - | - | Y | - |
| sav5690 | - | - | - | Y | - |
| sav5695 | - | - | - | Y | - |
| sav5699 | - | Y | - | - | - |
| sav5700 | - | Y | - | - | - |
| sav5701 | - | - | - | Y | - |
| sav5708 | - | - | - | Y | - |
| sav5709 | - | - | - | Y | - |
| sav5711 | - | Y | - | - | - |
| sav5741 | Y | - | - | - | - |
| sav5756 | - | - | - | Y | - |
| sav5764 | - | - | - | Y | - |
| sav5780 | - | - | - | Y | - |
| sav5781 | - | - | - | Y | - |
| sav5782 | - | - | - | Y | - |
| sav5794 | - | Y | - | - | - |
| sav5807 | Y | - | - | - | - |
| sav5810 | - | - | - | Y | - |
| sav5823 | - | - | - | Y | - |
| sav5836 | - | Y | - | - | - |
| sav5837 | - | Y | - | - | - |
| sav5862 | - | - | - | Y | - |
| sav5872 | - | - | - | Y | - |
| sav5882 | - | - | - | Y | - |
| sav5913 | - | - | - | Y | - |
| sav5929 | - | Y | - | - | - |
| sav5933 | - | Y | - | - | - |
| sav5936 | - | - | - | Y | - |
| sav5937 | - | - | - | Y | - |
| sav5985 | - | - | - | Y | - |
| sav5988 | - | - | - | Y | - |
| sav6012 | - | - | - | Y | - |

|         |   |   |   |   |   |
|---------|---|---|---|---|---|
| sav6015 | - | Y | - | - | - |
| sav6034 | - | - | - | Y | - |
| sav6048 | - | - | - | Y | - |
| sav6050 | - | - | - | Y | - |
| sav6057 | - | - | - | Y | - |
| sav6059 | - | - | - | Y | - |
| sav6061 | Y | - | - | - | - |
| sav6088 | - | - | - | Y | - |
| sav6090 | - | - | - | Y | - |
| sav6130 | - | - | - | Y | - |
| sav6134 | - | - | - | Y | - |
| sav6138 | - | - | - | Y | - |
| sav6139 | - | - | - | Y | - |
| sav6171 | Y | - | - | - | - |
| sav6228 | - | - | - | Y | - |
| sav6233 | Y | - | - | - | - |
| sav6237 | - | - | - | Y | - |
| sav6241 | - | Y | - | - | - |
| sav6256 | - | - | - | Y | - |
| sav6261 | - | - | - | Y | - |
| sav6287 | - | - | - | Y | - |
| sav6303 | - | - | - | Y | - |
| sav6320 | - | - | - | Y | - |
| sav6391 | - | - | - | Y | - |
| sav6399 | Y | - | - | - | - |
| sav6410 | - | - | - | Y | - |
| sav6423 | - | Y | - | - | - |
| sav6429 | - | - | - | Y | - |
| sav6434 | - | - | - | Y | - |
| sav6456 | - | - | - | Y | - |
| sav6464 | - | - | - | Y | - |
| sav6483 | - | Y | - | - | - |
| sav6498 | - | - | - | Y | - |
| sav6533 | - | - | - | Y | - |
| sav6542 | - | Y | - | - | - |
| sav6543 | - | Y | - | - | - |
| sav6556 | - | - | - | Y | - |
| sav6561 | - | - | - | Y | - |
| sav6567 | - | - | - | Y | - |
| sav6585 | - | - | - | Y | - |
| sav6597 | - | - | - | Y | - |
| sav6602 | - | - | - | Y | - |

|         |   |   |   |   |                       |
|---------|---|---|---|---|-----------------------|
| sav6606 | - | - | - | Y | -                     |
| sav6608 | - | - | - | Y | -                     |
| sav6636 | - | - | - | Y | -                     |
| sav6637 | Y | - | - | - | -                     |
| sav6648 | - | - | - | Y | -                     |
| sav6674 | Y | - | - | - | -                     |
| sav6675 | - | Y | - | - | -                     |
| sav6696 | - | - | - | Y | -                     |
| sav6707 | - | - | - | Y | -                     |
| sav6711 | - | - | - | Y | -                     |
| sav6712 | - | - | - | Y | -                     |
| sav6731 | - | - | - | Y | -                     |
| sav6787 | - | - | - | Y | -                     |
| sav6805 | - | Y | - | - | -                     |
| sav6816 | - | - | - | Y | -                     |
| sav6823 | - | Y | - | - | -                     |
| sav6888 | - | - | - | Y | -                     |
| sav6893 | - | Y | - | - | -                     |
| sav6894 | - | Y | - | - | -                     |
| sav6897 | - | - | - | Y | -                     |
| sav6956 | - | Y | - | - | -                     |
| sav6959 | - | - | - | Y | -                     |
| sav6961 | - | - | - | Y | -                     |
| sav6991 | - | - | - | Y | -                     |
| sav6993 | - | - | - | Y | -                     |
| sav7004 | - | - | - | Y | -                     |
| sav7039 | - | - | - | Y | -                     |
| sav7058 | - | - | - | Y | -                     |
| sav7059 | - | - | - | Y | -                     |
| sav7075 | - | - | - | Y | -                     |
| sav7087 | - | - | - | Y | -                     |
| sav7088 | - | Y | - | - | -                     |
| sav7090 | - | - | - | Y | -                     |
| sav7094 | - | Y | - | - | -                     |
| sav7096 | - | - | - | Y | -                     |
| sav7098 | - | Y | - | - | -                     |
| sav7118 | - | - | - | Y | -                     |
| sav7129 | - | - | - | Y | -                     |
| sav7165 | - | - | - | Y | Non-ribosomal peptide |
| sav7188 | - | - | - | Y | -                     |
| sav7218 | - | - | - | Y | -                     |

|          |   |   |   |   |         |
|----------|---|---|---|---|---------|
| sav7247  | - | - | - | Y | -       |
| sav7248  | - | Y | - | - | -       |
| sav7249  | - | - | - | Y | -       |
| sav7250  | - | Y | - | - | -       |
| sav7251  | - | Y | - | - | -       |
| sav7289  | - | - | - | Y | -       |
| sav7299  | - | - | - | Y | -       |
| sav7311  | - | - | - | Y | -       |
| sav7313  | - | - | - | Y | -       |
| sav7327  | - | - | - | Y | -       |
| sav7337  | - | - | - | Y | -       |
| sav7343  | - | - | - | Y | -       |
| sav7346  | - | Y | - | - | -       |
| sav7388  | - | Y | - | - | -       |
| sav7389  | - | Y | - | - | -       |
| sav7419  | - | - | - | Y | -       |
| sav7429  | - | - | - | Y | -       |
| sav7442  | Y | - | - | - | -       |
| sav7448  | - | - | - | Y | -       |
| sav7449  | Y | - | - | - | -       |
| sav7477  | - | - | - | Y | -       |
| sav7481  | - | - | - | Y | -       |
| sav7486  | - | - | - | Y | -       |
| sav7487  | - | Y | - | - | -       |
| sav7498  | - | - | - | Y | -       |
| sav7513  | - | - | - | Y | -       |
| sav7519  | - | - | - | Y | -       |
| sav7536  | - | - | - | Y | -       |
| sav7544  | - | - | - | Y | -       |
|          |   |   |   |   |         |
| sven0002 | - | - | - | Y | -       |
| sven0003 | - | - | - | Y | -       |
| sven0013 | - | - | - | Y | -       |
| sven0053 | - | - | - | Y | -       |
| sven0066 | - | - | - | Y | -       |
| sven0181 | - | - | - | Y | -       |
| sven0203 | - | - | - | Y | -       |
| sven0204 | - | - | - | Y | -       |
| sven0216 | - | - | - | Y | -       |
| sven0227 | - | - | - | Y | Ectoine |
| sven0253 | - | - | - | Y | -       |
| sven0265 | - | Y | - | - | Terpene |

|                 |   |   |   |   |                                                     |
|-----------------|---|---|---|---|-----------------------------------------------------|
| <i>sven0287</i> | - | - | - | Y | -                                                   |
| <i>sven0301</i> | - | - | - | Y | -                                                   |
| <i>sven0335</i> | - | - | - | Y | -                                                   |
| <i>sven0338</i> | - | Y | - | - | -                                                   |
| <i>sven0347</i> | Y | - | - | - | -                                                   |
| <i>sven0363</i> | - | - | - | Y | -                                                   |
| <i>sven0365</i> | - | Y | - | - | -                                                   |
| <i>sven0367</i> | - | - | - | Y | -                                                   |
| <i>sven0369</i> | - | - | - | Y | -                                                   |
| <i>sven0375</i> | - | - | - | Y | -                                                   |
| <i>sven0422</i> | - | - | - | Y | -                                                   |
| <i>sven0432</i> | - | - | - | Y | -                                                   |
| <i>sven0434</i> | - | - | - | Y | -                                                   |
| <i>sven0452</i> | Y | - | - | - | -                                                   |
| <i>sven0480</i> | - | - | - | Y | Polyketide /<br>non-<br>ribosomal<br>peptide hybrid |
| <i>sven0501</i> | - | - | - | Y | Polyketide /<br>non-<br>ribosomal<br>peptide hybrid |
| <i>sven0516</i> | - | - | - | Y | Polyketide /<br>non-<br>ribosomal<br>peptide hybrid |
| <i>sven0519</i> | - | - | - | Y | Polyketide /<br>non-<br>ribosomal<br>peptide hybrid |
| <i>sven0552</i> | - | Y | - | - | Terpene                                             |
| <i>sven0579</i> | - | - | - | Y | -                                                   |
| <i>sven0591</i> | - | Y | - | - | -                                                   |
| <i>sven0604</i> | - | - | - | Y | -                                                   |
| <i>sven0605</i> | Y | - | - | - | -                                                   |
| <i>sven0611</i> | - | - | - | Y | -                                                   |
| <i>sven0645</i> | - | - | - | Y | Lantipeptide                                        |
| <i>sven0658</i> | - | - | - | Y | Lantipeptide                                        |
| <i>sven0659</i> | Y | - | - | - | Lantipeptide                                        |
| <i>sven0666</i> | - | - | - | Y | -                                                   |
| <i>sven0689</i> | - | - | - | Y | -                                                   |
| <i>sven0693</i> | - | - | - | Y | -                                                   |
| <i>sven0712</i> | - | - | - | Y | -                                                   |
| <i>sven0719</i> | - | - | - | Y | -                                                   |
| <i>sven0724</i> | - | - | - | Y | -                                                   |
| <i>sven0735</i> | - | Y | - | - | -                                                   |

|          |   |   |   |   |        |
|----------|---|---|---|---|--------|
| sven0738 | - | - | - | Y | -      |
| sven0741 | - | - | - | Y | -      |
| sven0747 | - | - | - | Y | -      |
| sven0767 | - | Y | - | - | Indole |
| sven0787 | - | - | - | Y | -      |
| sven0826 | - | - | - | Y | -      |
| sven0827 | - | - | - | Y | -      |
| sven0842 | - | - | - | Y | -      |
| sven0843 | - | - | - | Y | -      |
| sven0856 | - | - | - | Y | -      |
| sven0867 | - | - | - | Y | -      |
| sven0868 | - | - | - | Y | -      |
| sven0879 | - | - | - | Y | -      |
| sven0891 | - | - | - | Y | -      |
| sven0898 | - | - | - | Y | -      |
| sven0904 | Y | - | - | - | -      |
| sven0912 | - | - | - | Y | -      |
| sven0913 | - | - | - | Y | -      |
| sven0916 | - | - | - | Y | -      |
| sven0936 | - | - | - | Y | -      |
| sven0954 | - | - | - | Y | -      |
| sven0964 | - | - | - | Y | -      |
| sven1046 | - | - | - | Y | -      |
| sven1050 | - | - | - | Y | -      |
| sven1064 | - | - | - | Y | -      |
| sven1065 | - | - | - | Y | -      |
| sven1075 | - | - | - | Y | -      |
| sven1079 | Y | - | - | - | -      |
| sven1094 | - | - | - | Y | -      |
| sven1098 | Y | - | - | - | -      |
| sven1105 | - | - | - | Y | -      |
| sven1116 | Y | - | - | - | -      |
| sven1128 | - | - | - | Y | -      |
| sven1130 | Y | Y | - | - | -      |
| sven1131 | - | Y | - | - | -      |
| sven1132 | - | - | - | Y | -      |
| sven1158 | Y | - | - | - | -      |
| sven1160 | - | Y | - | - | -      |
| sven1167 | - | - | - | Y | -      |
| sven1178 | - | - | - | Y | -      |
| sven1184 | - | - | - | Y | -      |
| sven1187 | - | - | - | Y | -      |

|          |   |   |   |   |   |
|----------|---|---|---|---|---|
| sven1197 | - | Y | - | - | - |
| sven1202 | - | - | - | Y | - |
| sven1230 | - | - | - | Y | - |
| sven1237 | Y | - | - | - | - |
| sven1239 | Y | - | - | - | - |
| sven1242 | - | - | - | Y | - |
| sven1252 | Y | - | - | - | - |
| sven1262 | - | - | - | Y | - |
| sven1283 | - | - | - | Y | - |
| sven1316 | - | - | - | Y | - |
| sven1372 | - | Y | - | - | - |
| sven1373 | - | Y | - | - | - |
| sven1384 | - | - | - | Y | - |
| sven1396 | - | - | - | Y | - |
| sven1413 | - | - | - | Y | - |
| sven1421 | - | - | - | Y | - |
| sven1432 | - | - | - | Y | - |
| sven1440 | - | - | - | Y | - |
| sven1447 | - | Y | - | - | - |
| sven1448 | - | Y | - | - | - |
| sven1459 | - | Y | - | - | - |
| sven1464 | - | - | - | Y | - |
| sven1472 | - | - | - | Y | - |
| sven1477 | - | Y | - | - | - |
| sven1478 | - | Y | - | - | - |
| sven1489 | - | Y | - | - | - |
| sven1508 | - | - | - | Y | - |
| sven1517 | - | - | - | Y | - |
| sven1528 | - | - | - | Y | - |
| sven1531 | - | - | - | Y | - |
| sven1536 | - | - | - | Y | - |
| sven1561 | - | - | - | Y | - |
| sven1569 | - | - | - | Y | - |
| sven1593 | - | - | - | Y | - |
| sven1619 | - | - | - | Y | - |
| sven1626 | - | - | - | Y | - |
| sven1638 | - | - | - | Y | - |
| sven1661 | - | - | - | Y | - |
| sven1663 | - | - | - | Y | - |
| sven1669 | - | - | - | Y | - |
| sven1675 | - | - | - | Y | - |
| sven1677 | Y | - | - | - | - |



|          |   |   |   |   |   |
|----------|---|---|---|---|---|
| sven1690 | - | - | - | Y | - |
| sven1694 | Y | - | - | - | - |
| sven1699 | - | - | - | Y | - |
| sven1735 | - | - | - | Y | - |
| sven1760 | - | - | - | Y | - |
| sven1774 | - | Y | - | - | - |
| sven1778 | - | - | - | Y | - |
| sven1785 | - | - | - | Y | - |
| sven1792 | - | - | - | Y | - |
| sven1801 | - | - | - | Y | - |
| sven1803 | - | - | - | Y | - |
| sven1805 | Y | - | - | - | - |
| sven1809 | Y | - | - | - | - |
| sven1810 | - | - | - | Y | - |
| sven1812 | Y | - | - | - | - |
| sven1821 | Y | - | - | - | - |
| sven1828 | - | - | - | Y | - |
| sven1829 | Y | - | - | - | - |
| sven1834 | - | - | - | Y | - |
| sven1843 | - | - | - | Y | - |
| sven1857 | - | - | - | Y | - |
| sven1865 | - | - | - | Y | - |
| sven1866 | Y | - | - | - | - |
| sven1868 | - | - | - | Y | - |
| sven1870 | - | - | - | Y | - |
| sven1887 | - | - | - | Y | - |
| sven1892 | Y | - | - | - | - |
| sven1897 | - | - | - | Y | - |
| sven1933 | - | - | - | Y | - |
| sven1949 | - | - | - | Y | - |
| sven1953 | - | - | - | Y | - |
| sven1961 | - | - | - | Y | - |
| sven1962 | - | Y | - | - | - |
| sven1964 | - | - | - | Y | - |
| sven1981 | - | - | - | Y | - |
| sven1989 | - | - | - | Y | - |
| sven1997 | - | - | - | Y | - |
| sven2033 | - | - | - | Y | - |
| sven2059 | - | - | - | Y | - |
| sven2065 | - | - | - | Y | - |
| sven2067 | - | - | - | Y | - |
| sven2072 | - | - | - | Y | - |

|          |   |   |   |   |   |
|----------|---|---|---|---|---|
| sven2095 | - | - | - | Y | - |
| sven2151 | - | - | - | Y | - |
| sven2152 | - | - | - | Y | - |
| sven2172 | - | - | - | Y | - |
| sven2175 | - | - | - | Y | - |
| sven2178 | Y | - | - | - | - |
| sven2181 | - | - | - | Y | - |
| sven2190 | - | - | - | Y | - |
| sven2195 | - | - | - | Y | - |
| sven2209 | Y | - | - | - | - |
| sven2210 | - | - | - | Y | - |
| sven2229 | - | - | - | Y | - |
| sven2235 | - | - | - | Y | - |
| sven2262 | - | - | - | Y | - |
| sven2270 | - | - | - | Y | - |
| sven2281 | - | - | - | Y | - |
| sven2284 | - | - | - | Y | - |
| sven2292 | - | - | - | Y | - |
| sven2293 | - | - | - | Y | - |
| sven2297 | - | - | - | Y | - |
| sven2298 | - | - | - | Y | - |
| sven2315 | - | - | - | Y | - |
| sven2325 | - | - | - | Y | - |
| sven2338 | - | - | - | Y | - |
| sven2341 | Y | - | - | - | - |
| sven2365 | - | - | - | Y | - |
| sven2371 | Y | - | - | - | - |
| sven2380 | - | - | - | Y | - |
| sven2386 | Y | - | - | - | - |
| sven2394 | - | - | - | Y | - |
| sven2405 | - | - | - | Y | - |
| sven2409 | - | - | - | Y | - |
| sven2416 | - | - | - | Y | - |
| sven2419 | - | - | - | Y | - |
| sven2438 | - | - | - | Y | - |
| sven2442 | - | - | - | Y | - |
| sven2450 | - | - | - | Y | - |
| sven2451 | - | - | - | Y | - |
| sven2516 | - | - | - | Y | - |
| sven2518 | - | - | - | Y | - |
| sven2521 | - | - | - | Y | - |
| sven2550 | - | - | - | Y | - |

|          |   |   |   |   |   |
|----------|---|---|---|---|---|
| sven2552 | Y | - | - | - | - |
| sven2557 | - | - | - | Y | - |
| sven2582 | - | - | - | Y | - |
| sven2586 | - | - | - | Y | - |
| sven2612 | - | - | - | Y | - |
| sven2639 | - | Y | - | - | - |
| sven2642 | - | - | - | Y | - |
| sven2667 | - | - | - | Y | - |
| sven2675 | - | - | - | Y | - |
| sven2678 | Y | Y | - | - | - |
| sven2683 | - | - | - | Y | - |
| sven2688 | - | - | - | Y | - |
| sven2691 | - | - | - | Y | - |
| sven2696 | - | - | - | Y | - |
| sven2719 | - | - | - | Y | - |
| sven2723 | - | - | - | Y | - |
| sven2750 | - | - | - | Y | - |
| sven2753 | - | - | - | Y | - |
| sven2754 | Y | - | - | - | - |
| sven2760 | - | - | - | Y | - |
| sven2761 | - | - | - | Y | - |
| sven2785 | Y | - | - | - | - |
| sven2793 | Y | - | - | - | - |
| sven2799 | - | - | - | Y | - |
| sven2814 | - | - | - | Y | - |
| sven2829 | - | - | - | Y | - |
| sven2833 | Y | - | - | - | - |
| sven2835 | - | - | - | Y | - |
| sven2837 | - | Y | - | - | - |
| sven2840 | - | - | - | Y | - |
| sven2850 | - | - | - | Y | - |
| sven2878 | - | - | - | Y | - |
| sven2879 | - | - | - | Y | - |
| sven2886 | - | - | - | Y | - |
| sven2889 | - | - | - | Y | - |
| sven2890 | - | - | - | Y | - |
| sven2895 | - | - | - | Y | - |
| sven2967 | - | - | - | Y | - |
| sven2992 | - | - | - | Y | - |
| sven3000 | - | - | - | Y | - |
| sven3008 | - | - | - | Y | - |
| sven3009 | - | - | - | Y | - |

|          |   |   |   |   |   |
|----------|---|---|---|---|---|
| sven3029 | - | - | - | Y | - |
| sven3035 | - | Y | - | - | - |
| sven3036 | - | Y | - | - | - |
| sven3037 | - | - | - | Y | - |
| sven3038 | - | - | - | Y | - |
| sven3043 | - | - | - | Y | - |
| sven3044 | - | - | - | Y | - |
| sven3050 | - | - | - | Y | - |
| sven3056 | - | - | - | Y | - |
| sven3064 | - | - | - | Y | - |
| sven3077 | Y | - | - | - | - |
| sven3080 | - | - | - | Y | - |
| sven3102 | - | Y | - | - | - |
| sven3120 | - | - | - | Y | - |
| sven3126 | - | Y | - | - | - |
| sven3127 | - | Y | - | - | - |
| sven3146 | - | - | - | Y | - |
| sven3148 | - | - | - | Y | - |
| sven3150 | - | - | - | Y | - |
| sven3152 | - | - | - | Y | - |
| sven3160 | - | - | - | Y | - |
| sven3162 | - | - | - | Y | - |
| sven3165 | - | - | - | Y | - |
| sven3175 | - | - | - | Y | - |
| sven3176 | - | - | - | Y | - |
| sven3179 | Y | - | - | - | - |
| sven3180 | Y | - | - | Y | - |
| sven3209 | - | - | - | Y | - |
| sven3224 | - | Y | - | - | - |
| sven3237 | - | - | - | Y | - |
| sven3247 | - | - | - | Y | - |
| sven3254 | - | - | - | Y | - |
| sven3260 | - | - | - | Y | - |
| sven3273 | - | - | - | Y | - |
| sven3286 | - | - | - | Y | - |
| sven3293 | - | - | - | Y | - |
| sven3300 | - | - | - | Y | - |
| sven3320 | - | - | - | Y | - |
| sven3329 | - | - | - | Y | - |
| sven3338 | - | - | - | Y | - |
| sven3340 | - | - | - | Y | - |
| sven3348 | - | Y | - | - | - |

|          |   |   |   |   |   |
|----------|---|---|---|---|---|
| sven3349 | - | Y | - | - | - |
| sven3360 | - | - | - | Y | - |
| sven3368 | - | - | - | Y | - |
| sven3370 | - | - | - | Y | - |
| sven3371 | Y | - | - | - | - |
| sven3388 | - | - | - | Y | - |
| sven3423 | - | - | - | Y | - |
| sven3433 | Y | - | - | - | - |
| sven3469 | - | - | - | Y | - |
| sven3473 | - | - | - | Y | - |
| sven3485 | Y | - | - | - | - |
| sven3490 | - | - | - | Y | - |
| sven3505 | - | - | - | Y | - |
| sven3515 | - | - | - | Y | - |
| sven3525 | - | Y | - | - | - |
| sven3533 | - | Y | - | - | - |
| sven3535 | - | - | - | Y | - |
| sven3551 | - | - | - | Y | - |
| sven3566 | Y | - | - | - | - |
| sven3571 | - | - | - | Y | - |
| sven3577 | - | - | - | Y | - |
| sven3579 | - | - | - | Y | - |
| sven3593 | - | - | - | Y | - |
| sven3606 | - | Y | - | - | - |
| sven3610 | - | Y | - | - | - |
| sven3611 | - | - | - | Y | - |
| sven3613 | - | - | - | Y | - |
| sven3627 | Y | - | - | - | - |
| sven3643 | - | Y | - | - | - |
| sven3644 | - | Y | - | - | - |
| sven3657 | - | - | - | Y | - |
| sven3659 | Y | - | - | - | - |
| sven3696 | - | - | - | Y | - |
| sven3706 | - | - | - | Y | - |
| sven3711 | - | - | - | Y | - |
| sven3712 | - | - | - | Y | - |
| sven3715 | - | - | - | Y | - |
| sven3717 | - | - | - | Y | - |
| sven3718 | - | - | - | Y | - |
| sven3719 | - | - | - | Y | - |
| sven3721 | - | - | - | Y | - |
| sven3729 | - | - | - | Y | - |

|          |   |   |   |   |   |
|----------|---|---|---|---|---|
| sven3763 | - | - | - | Y | - |
| sven3768 | - | - | - | Y | - |
| sven3796 | - | - | - | Y | - |
| sven3814 | - | - | - | Y | - |
| sven3837 | - | - | - | Y | - |
| sven3846 | - | - | - | Y | - |
| sven3847 | - | - | - | Y | - |
| sven3854 | - | - | - | Y | - |
| sven3859 | - | - | - | Y | - |
| sven3874 | - | - | - | Y | - |
| sven3891 | - | - | - | Y | - |
| sven3893 | - | - | - | Y | - |
| sven3894 | - | - | - | Y | - |
| sven3895 | Y | - | - | - | - |
| sven3925 | Y | - | - | - | - |
| sven3961 | - | - | - | Y | - |
| sven3963 | - | - | - | Y | - |
| sven3966 | - | - | - | Y | - |
| sven3982 | - | - | - | Y | - |
| sven3983 | - | - | - | Y | - |
| sven4021 | - | - | - | Y | - |
| sven4025 | - | - | - | Y | - |
| sven4033 | - | - | - | Y | - |
| sven4036 | - | - | - | Y | - |
| sven4042 | - | - | - | Y | - |
| sven4043 | Y | - | - | - | - |
| sven4066 | - | - | - | Y | - |
| sven4089 | - | - | - | Y | - |
| sven4090 | - | - | - | Y | - |
| sven4095 | - | - | - | Y | - |
| sven4103 | - | - | - | Y | - |
| sven4130 | Y | - | - | - | - |
| sven4135 | - | - | - | Y | - |
| sven4138 | - | - | - | Y | - |
| sven4149 | - | - | - | Y | - |
| sven4199 | - | - | - | Y | - |
| sven4204 | - | - | - | Y | - |
| sven4205 | - | - | - | Y | - |
| sven4211 | - | - | - | Y | - |
| sven4227 | Y | - | - | - | - |
| sven4231 | - | - | - | Y | - |
| sven4262 | - | - | - | Y | - |

|          |   |   |   |   |   |
|----------|---|---|---|---|---|
| sven4267 | Y | - | - | - | - |
| sven4270 | Y | - | - | - | - |
| sven4281 | - | - | - | Y | - |
| sven4283 | - | - | - | Y | - |
| sven4285 | - | - | - | Y | - |
| sven4288 | - | - | - | Y | - |
| sven4296 | - | - | - | Y | - |
| sven4319 | Y | - | - | - | - |
| sven4333 | - | - | - | Y | - |
| sven4337 | Y | - | - | - | - |
| sven4346 | Y | - | - | - | - |
| sven4361 | - | - | - | Y | - |
| sven4364 | Y | - | - | - | - |
| sven4374 | - | - | - | Y | - |
| sven4407 | Y | - | - | - | - |
| sven4426 | - | Y | - | - | - |
| sven4444 | - | - | - | Y | - |
| sven4451 | - | - | - | Y | - |
| sven4456 | - | - | - | Y | - |
| sven4458 | Y | - | - | - | - |
| sven4468 | - | Y | - | - | - |
| sven4469 | - | - | - | Y | - |
| sven4472 | - | - | - | Y | - |
| sven4498 | Y | - | - | - | - |
| sven4518 | - | - | - | Y | - |
| sven4521 | Y | - | - | - | - |
| sven4544 | Y | - | - | - | - |
| sven4590 | - | - | - | Y | - |
| sven4592 | - | - | - | Y | - |
| sven4600 | - | - | - | Y | - |
| sven4609 | - | - | - | Y | - |
| sven4613 | - | Y | - | - | - |
| sven4614 | - | Y | - | - | - |
| sven4621 | - | - | - | Y | - |
| sven4629 | - | - | - | Y | - |
| sven4631 | - | - | - | Y | - |
| sven4671 | - | - | - | Y | - |
| sven4724 | - | - | - | Y | - |
| sven4747 | - | - | - | Y | - |
| sven4751 | - | - | - | Y | - |
| sven4789 | - | Y | - | - | - |
| sven4792 | - | - | - | Y | - |

|          |   |   |   |   |               |
|----------|---|---|---|---|---------------|
| sven4795 | - | - | - | Y | -             |
| sven4810 | - | - | - | Y | -             |
| sven4813 | - | Y | - | - | -             |
| sven4814 | - | Y | - | - | -             |
| sven4833 | - | - | - | Y | -             |
| sven4844 | - | Y | - | - | -             |
| sven4847 | Y | - | - | - | -             |
| sven4863 | - | - | - | Y | -             |
| sven4869 | - | - | - | Y | -             |
| sven4898 | - | - | - | Y | -             |
| sven4907 | - | - | - | Y | -             |
| sven4943 | - | - | - | Y | -             |
| sven4944 | - | - | - | Y | -             |
| sven4946 | - | Y | - | - | -             |
| sven4954 | - | - | - | Y | -             |
| sven4957 | - | - | - | Y | -             |
| sven4980 | - | - | - | Y | -             |
| sven4983 | - | - | - | Y | -             |
| sven5031 | - | - | - | Y | -             |
| sven5041 | - | - | - | Y | -             |
| sven5062 | - | - | - | Y | -             |
| sven5072 | Y | - | - | - | -             |
| sven5093 | - | - | - | Y | Butyrolactone |
| sven5118 | - | - | - | Y | -             |
| sven5157 | - | - | - | Y | -             |
| sven5160 | - | - | - | Y | -             |
| sven5207 | - | - | - | Y | -             |
| sven5253 | - | - | - | Y | -             |
| sven5256 | - | - | - | Y | -             |
| sven5258 | - | - | - | Y | -             |
| sven5271 | - | - | - | Y | -             |
| sven5283 | - | - | - | Y | -             |
| sven5302 | - | - | - | Y | -             |
| sven5368 | - | - | - | Y | Polyketide    |
| sven5390 | - | Y | - | - | -             |
| sven5393 | - | - | - | Y | -             |
| sven5395 | - | - | - | Y | -             |
| sven5405 | - | - | - | Y | -             |
| sven5414 | - | - | - | Y | Siderophore   |
| sven5420 | - | - | - | Y | Siderophore   |
| sven5426 | - | - | - | Y | -             |
| sven5451 | - | - | - | Y | -             |



|          |   |   |   |   |                            |
|----------|---|---|---|---|----------------------------|
| sven5462 | - | - | - | Y | -                          |
| sven5480 | - | - | - | Y | Siderophore                |
| sven5500 | - | - | - | Y | -                          |
| sven5522 | - | - | - | Y | -                          |
| sven5528 | - | - | - | Y | -                          |
| sven5561 | - | - | - | Y | -                          |
| sven5571 | - | - | - | Y | -                          |
| sven5596 | - | - | - | Y | -                          |
| sven5656 | - | - | - | Y | -                          |
| sven5682 | - | - | - | Y | -                          |
| sven5686 | - | - | - | Y | -                          |
| sven5700 | - | - | - | Y | -                          |
| sven5709 | - | - | - | Y | -                          |
| sven5712 | - | - | - | Y | -                          |
| sven5715 | - | - | - | Y | -                          |
| sven5721 | - | - | - | Y | -                          |
| sven5767 | - | - | - | Y | -                          |
| sven5780 | - | - | - | Y | -                          |
| sven5798 | - | - | - | Y | -                          |
| sven5802 | - | - | - | Y | -                          |
| sven5809 | - | - | - | Y | -                          |
| sven5860 | - | - | - | Y | -                          |
| sven5862 | - | - | - | Y | -                          |
| sven5871 | - | - | - | Y | -                          |
| sven5875 | - | - | - | Y | -                          |
| sven5897 | - | - | - | Y | -                          |
| sven5904 | - | - | - | Y | -                          |
| sven5931 | - | - | - | Y | -                          |
| sven5936 | - | - | - | Y | -                          |
| sven5955 | Y | - | - | - | -                          |
| sven5960 | - | - | - | Y | -                          |
| sven5969 | Y | - | - | - | Butyrolactone / polyketide |
| sven6004 | - | - | - | Y | -                          |
| sven6027 | - | - | - | Y | -                          |
| sven6048 | - | - | - | Y | -                          |
| sven6055 | - | - | - | Y | -                          |
| sven6104 | - | - | - | Y | -                          |
| sven6109 | - | - | - | Y | -                          |
| sven6119 | - | - | - | Y | -                          |
| sven6142 | - | - | - | Y | -                          |
| sven6156 | - | - | - | Y | -                          |
| sven6180 | - | - | - | Y | Non-                       |

|          |   |   |   |   |                       |
|----------|---|---|---|---|-----------------------|
|          |   |   |   |   | ribosomal peptide     |
| sven6209 | - | - | - | Y | Non-ribosomal peptide |
| sven6213 | - | - | - | Y | Non-ribosomal peptide |
| sven6264 | - | - | - | Y | Non-ribosomal peptide |
| sven6310 | - | - | - | Y | -                     |
| sven6361 | - | - | - | Y | -                     |
| sven6381 | - | - | - | Y | -                     |
| sven6387 | - | - | - | Y | -                     |
| sven6396 | - | - | - | Y | -                     |
| sven6397 | - | - | - | Y | -                     |
| sven6404 | - | - | - | Y | -                     |
| sven6430 | - | - | - | Y | -                     |
| sven6434 | - | - | - | Y | -                     |
| sven6435 | - | Y | - | - | -                     |
| sven6437 | - | - | - | Y | Terpene               |
| sven6443 | - | - | - | Y | Terpene               |
| sven6455 | Y | - | - | - | Terpene               |
| sven6456 | Y | - | - | - | Terpene               |
| sven6457 | - | - | - | Y | Terpene               |
| sven6460 | - | - | - | Y | Terpene               |
| sven6464 | - | - | - | Y | -                     |
| sven6519 | - | - | - | Y | -                     |
| sven6523 | - | - | - | Y | -                     |
| sven6526 | - | - | - | Y | -                     |
| sven6531 | - | - | - | Y | Bacteriocin           |
| sven6564 | - | - | - | Y | -                     |
| sven6580 | - | - | - | Y | -                     |
| sven6621 | - | - | - | Y | -                     |
| sven6631 | - | - | - | Y | -                     |
| sven6657 | - | Y | - | - | -                     |
| sven6668 | - | - | - | Y | -                     |
| sven6673 | - | - | - | Y | -                     |
| sven6751 | - | - | - | Y | -                     |
| sven6784 | - | - | - | Y | -                     |
| sven6801 | - | - | - | Y | -                     |
| sven6803 | - | - | - | Y | -                     |
| sven6826 | Y | - | - | - | -                     |
| sven6833 | - | - | - | Y | -                     |

|          |   |   |   |   |                                           |
|----------|---|---|---|---|-------------------------------------------|
| sven6840 | - | - | - | Y | Melanin                                   |
| sven6863 | - | - | - | Y | -                                         |
| sven6866 | - | - | - | Y | -                                         |
| sven6872 | - | - | - | Y | -                                         |
| sven6873 | - | - | - | Y | -                                         |
| sven6885 | - | - | - | Y | -                                         |
| sven6900 | - | - | - | Y | -                                         |
| sven6901 | Y | - | - | - | -                                         |
| sven6935 | - | - | - | Y | -                                         |
| sven6936 | - | - | - | Y | -                                         |
| sven6949 | - | - | - | Y | -                                         |
| sven6957 | Y | - | - | - | -                                         |
| sven7023 | - | - | - | Y | -                                         |
| sven7111 | - | - | - | Y | Terpene                                   |
| sven7226 | - | - | - | Y | Polyketide                                |
| sven7271 | - | - | - | Y | -                                         |
| sven7272 | - | - | - | Y | -                                         |
| sven7281 | - | - | - | Y | -                                         |
| sven7282 | Y | - | - | - | -                                         |
| sven7289 | - | - | - | Y | -                                         |
| sven7294 | - | - | - | Y | -                                         |
| sven7301 | - | - | - | Y | -                                         |
| sven7316 | Y | - | - | - | -                                         |
| sven7317 | - | - | - | Y | -                                         |
| sven7324 | - | - | - | Y | -                                         |
| sven7335 | Y | - | - | - | -                                         |
| sven7351 | - | - | - | Y | -                                         |
| sven7396 | - | - | - | Y | -                                         |
| sven7418 | - | - | - | Y | -                                         |
| sven7451 | - | - | - | Y | Terpene /<br>non-<br>ribosomal<br>peptide |
| sven7453 | - | - | - | Y | -                                         |

\*Unclassified due to ambiguous transcription start sites and/or uneven coverage

<sup>x</sup> Location of clusters as per Nett *et al.* (2009) for *S. avermitilis* and *S. coelicolor*, and as determined using the program antiSMASH [Medema *et al.* (2011)] for *S. venezuelae*.

<sup>a</sup> Previously identified by Vockenhuber *et al.* (2011)

<sup>b</sup> Previously identified by Swiercz *et al.* (2008)

<sup>c</sup> Previously identified by D'Alia *et al.* (2010)

<sup>d</sup> Upregulated (or upregulated cutoRNA partner) in an RNase III mutant, as shown by Gatewood *et al.* (2012).

**References:**

D'Alia D, Nieselt K, Steigele S, Müller J, Verburg I, et al (2010) Noncoding RNA of glutamine synthetase I modulates antibiotic production in *Streptomyces coelicolor* A3(2). *J Bacteriol* 192: 1160-1164.

Gatewood ML, Bralley P, Weil MR, Jones GH (2012) RNA-Seq and RNA immunoprecipitation analyses of the transcriptome of *Streptomyces coelicolor* identify substrates for RNase III. *J Bacteriol* 194: 2228-2237.

Medema MH, Blin K, Cimermancic P, de Jager V, Zakrzewski P, et al. (2011) antiSMASH: rapid identification, annotation and analysis of secondary metabolite biosynthesis gene clusters in bacterial and fungal genome sequences. *Nucleic Acids Res.* doi: 10.1093/nar/gkr466

Nett M, Ikeda H, Moore BS (2009) Genomic basis for natural product biosynthetic diversity in the actinomycetes. *Nat Prod Rep* 26: 1362-1384

Swiercz JP, Hindra, Bobek J, Haiser HJ, DiBerardo C, et al. (2008) Small non-coding RNAs in *Streptomyces coelicolor*. *Nucleic Acid Res.* 36: 7240-7251.

Vockenhuber M-P, Sharma CM, Statt MG, Schmidt D, Xu Z, et al. (2011) Deep sequencing-based identification of small non-coding RNAs in *Streptomyces coelicolor*. *RNA Biology* 8: 468-477.

**Table S2. Conserved cutoRNA gene pairs.**

| Conserved cutoRNA gene pairs |                       |                      |                                                  |                                          | Conservation of convergent gene arrangement* |                   |                 |              |                |
|------------------------------|-----------------------|----------------------|--------------------------------------------------|------------------------------------------|----------------------------------------------|-------------------|-----------------|--------------|----------------|
| <i>S. coelicolor</i>         | <i>S. avermitilis</i> | <i>S. venezuelae</i> | Gene 1 annotation                                | Gene 2 annotation                        | <i>S. griseus</i>                            | <i>S. scabies</i> | <i>T. fusca</i> | <i>M. tb</i> | <i>F. alni</i> |
| sco1294 / sco1293            | sav7062 / sav7063     | sven0868 / sven0867  | putative cystathionine gamma-synthase            | hypothetical protein                     | Y                                            | Y                 | NH              | NH           | NH             |
| sco1841 / sco1842            | sav6424 / sav6423     | sven1488 / sven1489  | hypothetical protein                             | hypothetical protein                     | Y                                            | Y                 | NH              | NH           | NH             |
| sco2114 / sco2113            | sav6087 / sav6088     | sven1774 / sven1773  | hypothetical protein                             | putative bacterioferritin                | Y                                            | Y                 | NH              | NH           | N              |
| sco2267 / sco2268            | sav5930 / sav5929     | sven1952 / sven1953  | probable heme oxygenase                          | conserved hypothetical protein           | Y                                            | Y                 | NH              | NH           | NH             |
| sco2582 / sco2583            | sav5476 / sav5475     | sven2364 / sven2365  | conserved hypothetical protein SCC123.20.        | putative membrane protein.               | Y                                            | Y                 | NH              | NH           | NH             |
| sco3134 / sco3133            | sav3572 / sav3571     | sven2957 / sven2956  | putative two-component system response regulator | putative MarR-family regulator           | Y                                            | Y                 | NH              | NH           | NH             |
| sco3375 / sco3374            | sav4695 / sav4696     | sven3225 / sven3224  | putative Lsr2-like protein                       | hypothetical proline-rich protein        | Y                                            | Y                 | NH              | NH           | NH             |
| sco3579 / sco3578            | sav4584 / sav4585     | sven3349 / sven3348  | wblA                                             | putative ion-transporting ATPase         | Y                                            | Y                 | Y               | Y            | Y              |
| sco3008 / sco3007            | sav5068 / sav5069     | sven2751 / sven2750  | putative two-component system response regulator | conserved hypothetical protein           | Y                                            | Y                 | NH              | NH           | NH             |
| sco3190 / sco3191            | sav3681 / sav3682     | sven3035 / sven3036  | large-conductance mechanosensitive channel       | hypothetical protein                     | N                                            | Y                 | NH              | NH           | NH             |
| sco3833 / sco3832            | sav4360 / sav4361     | sven3607 / sven3606  | transcriptional regulator, TetR family           | putative transcriptional regulator       | Y                                            | Y                 | NH              | NH           | NH             |
| sco4282 / sco4283            | sav3943 / sav3942     | sven4035 / sven4036  | putative dimeric protein                         | putative tagatose-6-phosphate kinase     | Y                                            | Y                 | NH              | NH           | NH             |
| sco4335 / sco4334            | sav3896 / sav3897     | sven4150 / sven4149  | hypothetical protein                             | putative hypoxanthine / guanine permease | Y                                            | Y                 | NH              | NH           | NH             |
| sco5167 / sco5168            | sav3097 / sav3096     | sven4813 / sven4814  | hypothetical protein                             | hypothetical protein                     | Y                                            | Y                 | NH              | NH           | NH             |
| sco5255 / sco5256            | sav2987 / sav2986     | sven4945 / sven4946  | signal peptidase protein                         | hypothetical protein                     | Y                                            | Y                 | NH              | NH           | NH             |
| sco5390 / sco5389            | sav2865 / sav2866     | sven5041 / sven5040  | putative luciferase-family protein               | hypothetical protein                     | Y                                            | Y                 | NH              | NH           | N              |
| sco6750 / sco6749            | sav1663 / sav1664     | sven6435 / sven6434  | isopentenyl-diphosphate delta-isomerase          | hypothetical protein                     | Y                                            | Y                 | NH              | NH           | NH             |
| sco6771 / sco6772            | sav1643 / sav1642     | sven6456 / sven6457  | putative small hydrophobic secreted protein      | putative protein tyrosine phosphatase    | Y                                            | Y                 | NH              | NH           | NH             |
| sco7252 / sco7253            | sav1236 / sav1235     | sven0266 / sven0265  | putative regulatory protein                      | hypothetical protein                     | Y                                            | Y                 | NH              | NH           | NH             |

\* (Y) – YES

(N) – NO

(NH) - At least one of the two genes does not have homologues in the given species;

**Table S3: Intergenic sRNAs in *S. coelicolor*, *S. avermitilis*, and *S. venezuelae*.**

| Species              | sRNA name | Left Gene | Right Gene | Strand | Start   | End     | Size | Located within biosynthetic cluster <sup>y</sup> | Previously identified or predicted             |
|----------------------|-----------|-----------|------------|--------|---------|---------|------|--------------------------------------------------|------------------------------------------------|
| <i>S. coelicolor</i> |           |           |            |        |         |         |      |                                                  |                                                |
|                      | scr0636   | sco0635   | sco0636    | +      | 677033  | 677230  | 198  |                                                  |                                                |
|                      | scr0792   | sco0791   | sco0792    | +      | 838750  | 838863  | 114  |                                                  |                                                |
|                      | scr0959   | sco0958   | sco0959    | +      | 1008731 | 1008802 | 72   |                                                  |                                                |
|                      | scr0999   | sco0998   | sco0999    | -      | 1054736 | 1054647 | 90   |                                                  |                                                |
|                      | scr1104   | sco1103   | sco1104    | -      | 1161700 | 1161580 | 121  |                                                  | Vockenhuber et al (2011)                       |
|                      | scr1363   | sco1362   | sco1363    | -      | 1441015 | 1440924 | 92   |                                                  |                                                |
|                      | scr1390*  | sco1389   | sco1390    | -      | 1474104 | 1473910 | 195  |                                                  |                                                |
|                      | scr1424   | sco1423   | sco1424    | -      | 1519780 | 1519565 | 216  |                                                  |                                                |
|                      | scr1434   | sco1433   | sco1434    | +      | 1529418 | 1529480 | 63   |                                                  |                                                |
|                      | scr1594   | sco1593   | sco1594    | +      | 1703984 | 1704169 | 186  |                                                  |                                                |
|                      | scr1792*  | sco1791   | sco1792    | -      | 1922085 | 1921800 | 286  |                                                  | Panek et al (2008)                             |
|                      | scr1805   | sco1804   | sco1805    | -      | 1933162 | 1932972 | 191  |                                                  |                                                |
|                      | scr1961   | sco1960   | sco1961    | +      | 2099076 | 2099145 | 70   |                                                  |                                                |
|                      | scr2101   | sco2100   | sco2101    | -      | 2258212 | 2257982 | 231  |                                                  | Swiercz et al (2008)                           |
|                      | scr2107   | sco2106   | sco2107    | +      | 2264717 | 2264823 | 107  |                                                  |                                                |
|                      | scr2117   | sco2116   | sco2117    | +      | 2276540 | 2276611 | 72   |                                                  |                                                |
|                      | scr2136   | sco2135   | sco2136    | -      | 2297658 | 2297564 | 95   |                                                  |                                                |
|                      | scr2147   | sco2146   | sco2147    | -      | 2308772 | 2308678 | 95   |                                                  |                                                |
|                      | scr2257   | sco2256   | sco2257    | +      | 2424206 | 2424263 | 58   |                                                  |                                                |
|                      | scr2288   | sco2287   | sco2288    | +      | 2458925 | 2458996 | 72   |                                                  |                                                |
|                      | scr2446   | sco2445   | sco2446    | +      | 2625429 | 2625650 | 222  |                                                  |                                                |
|                      | scr2589   | sco2588   | sco2589    | +      | 2725406 | 2725465 | 60   |                                                  |                                                |
|                      | scr2528   | sco2527   | sco2528    | +      | 2725412 | 2725465 | 54   |                                                  |                                                |
|                      | scr2634   | sco2633   | sco2634    | +      | 2860742 | 2860810 | 69   |                                                  |                                                |
|                      | scr2736   | sco2735   | sco2736    | +      | 2982223 | 2982670 | 448  |                                                  | Swiercz et al (2008); Vockenhuber et al (2011) |
|                      | scr2750   | sco2749   | sco2750    | -      | 2996439 | 2996338 | 102  |                                                  |                                                |
|                      | scr2822   | sco2821   | sco2822    | +      | 3082275 | 3082345 | 71   |                                                  | Panek et al (2008)                             |
|                      | scr2922   | sco2921   | sco2922    | -      | 3174924 | 3174429 | 496  |                                                  |                                                |
|                      | scr2943   | sco2942   | sco2943    | +      | 3198596 | 3198780 | 185  |                                                  |                                                |
|                      | scr2952   | sco2951   | sco2952    | +      | 3208719 | 3208802 | 84   |                                                  | Vockenhuber et al (2011)                       |
|                      | scr3020*  | sco3019   | sco3020    | -      | 3302281 | 3302024 | 258  |                                                  |                                                |
|                      | scr3077   | sco3076   | sco3077    | -      | 3370220 | 3369991 | 230  |                                                  |                                                |
|                      | scr3097   | sco3096   | sco3097    | +      | 3391994 | 3392073 | 80   |                                                  |                                                |
|                      | scr3202   | sco3201   | sco3202    | -      | 3510186 | 3510094 | 93   |                                                  | Vockenhuber et al                              |

|  |          |         |         |   |         |         |     |  |                                                                                |
|--|----------|---------|---------|---|---------|---------|-----|--|--------------------------------------------------------------------------------|
|  |          |         |         |   |         |         |     |  | (2011)                                                                         |
|  | scr3253  | sco3252 | sco3253 | + | 3605514 | 3605596 | 83  |  |                                                                                |
|  | scr3334* | sco3333 | sco3334 | - | 3691139 | 3690886 | 254 |  | Panek et al (2008)                                                             |
|  | scr3410  | sco3409 | sco3410 | - | 3775694 | 3775649 | 46  |  |                                                                                |
|  | scr3437  | sco3436 | sco3437 | - | 3799361 | 3799139 | 223 |  |                                                                                |
|  | scr3558  | sco3557 | sco3558 | - | 3933668 | 3933527 | 142 |  | Panek et al (2008);<br>Swiercz et al<br>(2008);<br>Vockenhuber et al<br>(2011) |
|  | scr3559  | sco3558 | sco3559 | + | 3934693 | 3934919 | 227 |  | Panek et al (2008);<br>Vockenhuber et al<br>(2011)                             |
|  | scr3580  | sco3579 | sco3580 | - | 3958172 | 3957843 | 330 |  | Vockenhuber et al<br>(2011)                                                    |
|  | scr3603  | sco3602 | sco3603 | - | 3979771 | 3979385 | 387 |  |                                                                                |
|  | scr3679  | sco3678 | sco3679 | - | 4061931 | 4061681 | 251 |  |                                                                                |
|  | scr3716  | sco3715 | sco3716 | - | 4091239 | 4091112 | 128 |  |                                                                                |
|  | scr3901  | sco3900 | sco3901 | + | 4295743 | 4296186 | 444 |  |                                                                                |
|  | scr3920  | sco3919 | sco3920 | + | 4315358 | 4315489 | 132 |  | Vockenhuber et al<br>(2011)                                                    |
|  | scr3929  | sco3928 | sco3929 | + | 4323850 | 4324377 | 528 |  |                                                                                |
|  | scr3931  | sco3930 | sco3931 | - | 4326774 | 4326705 | 70  |  |                                                                                |
|  | scr4076* | sco4075 | sco4076 | - | 4470108 | 4470036 | 73  |  | Panek et al (2008)                                                             |
|  | scr4108  | sco4107 | sco4108 | + | 4507134 | 4507300 | 167 |  |                                                                                |
|  | scr4123* | sco4122 | sco4123 | + | 4530078 | 4530310 | 233 |  |                                                                                |
|  | scr4135  | sco4134 | sco4135 | - | 4550061 | 4549825 | 237 |  |                                                                                |
|  | scr4139  | sco4138 | sco4139 | - | 4553616 | 4553538 | 79  |  |                                                                                |
|  | scr4220  | sco4219 | sco4220 | - | 4627309 | 4627161 | 149 |  |                                                                                |
|  | scr4233  | sco4232 | sco4233 | - | 4637485 | 4637326 | 160 |  |                                                                                |
|  | scr4339  | sco4338 | sco4339 | + | 4753312 | 4753401 | 90  |  |                                                                                |
|  | scr4389  | sco4388 | sco4389 | - | 4805789 | 4805580 | 210 |  | Swiercz et al<br>(2008);<br>Vockenhuber et al<br>(2011)                        |
|  | scr4395  | sco4394 | sco4395 | - | 4811827 | 4811713 | 115 |  |                                                                                |
|  | scr4412  | sco4411 | sco4412 | - | 4829635 | 4829349 | 287 |  |                                                                                |
|  | scr4524  | sco4523 | sco4524 | - | 4944655 | 4944415 | 241 |  |                                                                                |
|  | scr4619  | sco4618 | sco4619 | + | 5043143 | 5043220 | 78  |  |                                                                                |
|  | scr4628  | sco4627 | sco4628 | + | 5049482 | 5049538 | 57  |  |                                                                                |
|  | scr4632  | sco4631 | sco4632 | + | 5054815 | 5055060 | 246 |  | Vockenhuber et al<br>(2011)                                                    |
|  | scr4677  | sco4676 | sco4677 | + | 5108129 | 5108199 | 71  |  | Swiercz et al<br>(2008)                                                        |
|  | scr4684  | sco4683 | sco4684 | + | 5113596 | 5113760 | 165 |  |                                                                                |

|                       |                      |         |         |   |         |         |     |                           |                                                   |
|-----------------------|----------------------|---------|---------|---|---------|---------|-----|---------------------------|---------------------------------------------------|
|                       | scr4689              | sco4688 | sco4689 | - | 5117055 | 5116751 | 305 |                           |                                                   |
|                       | scr4909              | sco4908 | sco4909 | + | 5341263 | 5341370 | 108 |                           |                                                   |
|                       | scr5028              | sco5027 | sco5028 | + | 5462580 | 5462628 | 49  |                           | Swiercz et al (2008)                              |
|                       | scr5112              | sco5111 | sco5112 | - | 5556709 | 5556524 | 186 |                           |                                                   |
|                       | scr5239              | sco5238 | sco5239 | + | 5699820 | 5700035 | 216 |                           |                                                   |
|                       | scr5346              | sco5345 | sco5346 | - | 5814859 | 5814784 | 76  |                           |                                                   |
|                       | scr5439              | sco5438 | sco5439 | - | 5912258 | 5912163 | 96  |                           | Panek et al (2008)                                |
|                       | scr5583              | sco5582 | sco5583 | + | 6085733 | 6085815 | 83  |                           |                                                   |
|                       | scr5633              | sco5632 | sco5633 | + | 6133070 | 6133458 | 389 |                           |                                                   |
|                       | scr5676              | sco5675 | sco5676 | - | 6176413 | 6176160 | 254 |                           | Swiercz et al (2008);<br>Vockenhuber et al (2011) |
|                       | scr5710              | sco5709 | sco5710 | - | 6221571 | 6221499 | 73  |                           |                                                   |
|                       | scr5839              | sco5838 | sco5839 | + | 6392117 | 6392286 | 170 |                           |                                                   |
|                       | scr5917              | sco5916 | sco5917 | + | 6484345 | 6484908 | 564 |                           |                                                   |
|                       | scr5922              | sco5921 | sco5922 | - | 6489972 | 6489791 | 182 |                           |                                                   |
|                       | scr5999              | sco5998 | sco5999 | - | 6575212 | 6574790 | 423 |                           |                                                   |
|                       | scr6106              | sco6105 | sco6106 | + | 6706591 | 6706667 | 77  |                           | Vockenhuber et al (2011)                          |
|                       | scr6154              | sco6153 | sco6154 | + | 6755084 | 6755550 | 467 |                           |                                                   |
|                       | scr6204              | sco6203 | sco6204 | - | 6818847 | 6818680 | 168 |                           |                                                   |
|                       | scr6214              | sco6213 | sco6214 | + | 6828082 | 6828120 | 39  |                           |                                                   |
|                       | scr6287              | sco6286 | sco6287 | - | 6946592 | 6946547 | 46  | Yellow cryptic polyketide |                                                   |
|                       | scr6925              | sco6924 | sco6925 | + | 7688336 | 7688467 | 132 |                           | Vockenhuber et al (2011)                          |
|                       | scr7098              | sco7097 | sco7098 | + | 7888419 | 7888550 | 132 |                           |                                                   |
|                       | scr7204              | sco7203 | sco7204 | + | 8006662 | 8007032 | 371 |                           |                                                   |
|                       | scr7213              | sco7212 | sco7213 | + | 8016644 | 8016820 | 177 |                           |                                                   |
|                       | scr7214              | sco7213 | sco7214 | + | 8017756 | 8017850 | 95  |                           |                                                   |
|                       | scr7434              | sco7433 | sco7434 | - | 8247159 | 8247075 | 85  |                           |                                                   |
|                       | scr7776              | sco7775 | sco7776 | + | 8604074 | 8604158 | 85  |                           |                                                   |
| <b>S. avermitilis</b> |                      |         |         |   |         |         |     |                           |                                                   |
|                       | sar0048              | sav47   | sav48   | + | 57774   | 57862   | 89  |                           |                                                   |
|                       | sar0059              | sav58   | sav59   | + | 67588   | 67733   | 146 |                           |                                                   |
|                       | sar0088              | sav87   | sav88   | + | 98161   | 98540   | 380 |                           |                                                   |
|                       | sar0170              | sav169  | sav170  | + | 189927  | 189977  | 51  |                           |                                                   |
|                       | sar0212              | sav211  | sav212  | + | 247123  | 247236  | 114 |                           |                                                   |
|                       | sar0245              | sav244  | sav245  | - | 282713  | 282594  | 120 |                           |                                                   |
|                       | sar0250              | sav249  | sav250  | - | 288680  | 288607  | 74  |                           |                                                   |
|                       | sar0273              | sav272  | sav273  | - | 320477  | 320276  | 202 |                           |                                                   |
|                       | sar0287              | sav286  | sav287  | - | 336631  | 336553  | 79  |                           |                                                   |
|                       | sar7594 <sup>x</sup> | sav312  | sav7594 | + | 370213  | 370258  | 46  |                           |                                                   |



|  |                      |         |         |   |         |         |     |                                           |  |
|--|----------------------|---------|---------|---|---------|---------|-----|-------------------------------------------|--|
|  | sar0324_1            | sav323  | sav324  | - | 382268  | 382160  | 109 |                                           |  |
|  | sar0324_2            | sav323  | sav324  | - | 382428  | 382371  | 58  |                                           |  |
|  | sar0324_3            | sav323  | sav324  | - | 382612  | 382447  | 166 |                                           |  |
|  | sar0351              | sav350  | sav351  | - | 412386  | 412056  | 331 |                                           |  |
|  | sar0353              | sav352  | sav353  | - | 414792  | 414750  | 43  |                                           |  |
|  | sar0444              | sav443  | sav444  | - | 598309  | 598225  | 85  |                                           |  |
|  | sar0466              | sav465  | sav466  | + | 616811  | 616926  | 116 |                                           |  |
|  | sar7577 <sup>x</sup> | sav504  | sav7577 | - | 648062  | 647767  | 296 |                                           |  |
|  | sar0625              | sav624  | sav625  | - | 777160  | 777061  | 100 |                                           |  |
|  | sar0634              | sav633  | sav634  | - | 788238  | 788113  | 126 |                                           |  |
|  | sar0709              | sav708  | sav709  | - | 864406  | 864174  | 233 |                                           |  |
|  | sar0742              | sav741  | sav742  | - | 890982  | 890920  | 63  |                                           |  |
|  | sar0778              | sav777  | sav778  | + | 927129  | 927220  | 92  |                                           |  |
|  | sar0805              | sav804  | sav805  | - | 958110  | 958026  | 85  |                                           |  |
|  | sar0823              | sav822  | sav823  | + | 973852  | 973976  | 125 |                                           |  |
|  | sar0829              | sav828  | sav829  | + | 982914  | 982983  | 70  |                                           |  |
|  | sar0959              | sav958  | sav959  | - | 1219321 | 1219274 | 48  |                                           |  |
|  | sar0964              | sav963  | sav964  | - | 1223354 | 1223170 | 185 |                                           |  |
|  | sar0967              | sav966  | sav967  | - | 1225858 | 1225751 | 108 |                                           |  |
|  | sar0994              | sav993  | sav994  | - | 1259585 | 1259487 | 99  |                                           |  |
|  | sar1055              | sav1054 | sav1055 | - | 1332741 | 1332671 | 71  |                                           |  |
|  | sar1077              | sav1076 | sav1077 | - | 1357266 | 1357224 | 43  |                                           |  |
|  | sar1106              | sav1105 | sav1106 | - | 1391110 | 1391029 | 82  |                                           |  |
|  | sar1129              | sav1128 | sav1129 | - | 1417372 | 1417296 | 77  |                                           |  |
|  | sar1190              | sav1189 | sav1190 | + | 1480461 | 1480530 | 70  |                                           |  |
|  | sar1249              | sav1248 | sav1249 | + | 1548899 | 1548993 | 95  | Polyketide / non-ribosomal peptide hybrid |  |
|  | sar1289              | sav1288 | sav1289 | - | 1597349 | 1597206 | 144 |                                           |  |
|  | sar1474              | sav1473 | sav1474 | - | 1817130 | 1817100 | 31  |                                           |  |
|  | sar1503              | sav1502 | sav1503 | - | 1843553 | 1843465 | 89  |                                           |  |
|  | sar1553              | sav1552 | sav1553 | - | 1912470 | 1912379 | 92  | Polyketide                                |  |
|  | sar1571              | sav1570 | sav1571 | + | 1935799 | 1935844 | 46  |                                           |  |
|  | sar1655              | sav1654 | sav1655 | + | 2027150 | 2027205 | 56  | Hopene                                    |  |
|  | sar1689              | sav1688 | sav1699 | + | 2066680 | 2066772 | 93  |                                           |  |
|  | sar1711              | sav1710 | sav1711 | - | 2091025 | 2090892 | 134 |                                           |  |
|  | sar1814              | sav1813 | sav1814 | + | 2216915 | 2217244 | 330 |                                           |  |
|  | sar2017              | sav2016 | sav2017 | - | 2458516 | 2458411 | 106 |                                           |  |
|  | sar2028              | sav2027 | sav2028 | + | 2468943 | 2469157 | 215 |                                           |  |
|  | sar2087              | sav2086 | sav2087 | - | 2541468 | 2541337 | 132 |                                           |  |
|  | sar2124              | sav2123 | sav2124 | - | 2590455 | 2590363 | 93  |                                           |  |
|  | sar2127              | sav2126 | sav2127 | + | 2594347 | 2594434 | 88  |                                           |  |
|  | sar2199              | sav2198 | sav2199 | + | 2673499 | 2673564 | 66  |                                           |  |
|  | sar2203              | sav2202 | sav2203 | + | 2682862 | 2683133 | 272 |                                           |  |
|  | sar2245              | sav2244 | sav2245 | + | 2732474 | 2732605 | 132 |                                           |  |

|  |            |         |          |   |         |         |     |                       |  |
|--|------------|---------|----------|---|---------|---------|-----|-----------------------|--|
|  | sar2254    | sav2253 | sav2254  | + | 2748973 | 2749062 | 90  |                       |  |
|  | sar2261    | sav2260 | sav2261  | + | 2758394 | 2758465 | 72  |                       |  |
|  | sar2301    | sav2300 | sav2301  | + | 2803270 | 2803624 | 355 |                       |  |
|  | sar2386    | sav2385 | sav2386  | - | 2911641 | 2911540 | 102 | Aromatic polyketide   |  |
|  | sar2406    | sav2405 | sav2406  | + | 2932336 | 2932772 | 437 |                       |  |
|  | sar2421    | sav2420 | sav2421  | - | 2949746 | 2949603 | 144 |                       |  |
|  | sar2515*   | sav2514 | SAV_2515 | - | 3079265 | 3079081 | 185 |                       |  |
|  | sar2517    | sav2516 | sav2517  | - | 3082189 | 3082129 | 61  |                       |  |
|  | sar2548    | sav2547 | sav2548  | + | 3126939 | 3127014 | 76  |                       |  |
|  | sar2551    | sav2550 | sav2551  | + | 3128837 | 3128898 | 62  |                       |  |
|  | sar2567    | sav2566 | sav2567  | - | 3148409 | 3148337 | 73  |                       |  |
|  | sar2627    | sav2626 | sav2627  | + | 3226335 | 3226392 | 58  |                       |  |
|  | sar2652    | sav2651 | sav2652  | - | 3250602 | 3250521 | 82  |                       |  |
|  | sar2765    | sav2764 | sav2765  | - | 3392358 | 3392270 | 89  |                       |  |
|  | sar2770    | sav2769 | sav2770  | - | 3399050 | 3398950 | 101 |                       |  |
|  | sar2808    | sav2807 | sav2808  | + | 3451152 | 3451231 | 80  |                       |  |
|  | sar2924    | sav2923 | sav2924  | + | 3659378 | 3659414 | 37  |                       |  |
|  | sar2966    | sav2965 | sav2966  | + | 3716515 | 3716601 | 87  |                       |  |
|  | sar3006    | sav3005 | sav3006  | - | 3760718 | 3760638 | 81  |                       |  |
|  | sar3017    | sav3016 | sav3017  | + | 3771883 | 3771800 | 84  |                       |  |
|  | sar3018    | sav3017 | sav3018  | - | 3773826 | 3773483 | 344 |                       |  |
|  | sar3107    | sav3106 | sav3107  | + | 3879684 | 3880075 | 392 |                       |  |
|  | sar3140    | sav3139 | sav3140  | + | 3912959 | 3913036 | 78  |                       |  |
|  | sar3145    | sav3144 | sav3145  | - | 3917556 | 3917496 | 61  |                       |  |
|  | sar3164    | sav3163 | sav3164  | + | 3941458 | 3941806 | 349 | Non-ribosomal peptide |  |
|  | sar3238    | sav3237 | sav3238  | - | 4036188 | 4036140 | 49  |                       |  |
|  | sar3338    | sav3337 | sav3338  | - | 4152217 | 4152150 | 68  |                       |  |
|  | sar3386    | sav3385 | sav3386  | + | 4207298 | 4207426 | 129 |                       |  |
|  | sar3482    | sav3481 | sav3482  | + | 4314599 | 4314690 | 92  |                       |  |
|  | sar3510    | sav3509 | sav3510  | - | 4344147 | 4344001 | 147 |                       |  |
|  | sar3573    | sav3572 | sav3573  | - | 4423000 | 4422844 | 157 |                       |  |
|  | sar3677    | sav3676 | sav3677  | + | 4553774 | 4553929 | 156 |                       |  |
|  | sar3679    | sav3678 | sav3679  | + | 4555649 | 4555702 | 54  |                       |  |
|  | sar3694_1  | sav3693 | sav3694  | + | 4571212 | 4571486 | 275 |                       |  |
|  | sar3694_2  | sav3693 | sav3694  | - | 4571405 | 4571266 | 140 |                       |  |
|  | sar3698    | sav3697 | sav3698  | - | 4575349 | 4575256 | 94  |                       |  |
|  | sar3708_1* | sav3707 | sav3708  | + | 4590173 | 4590242 | 70  |                       |  |
|  | sar3708_2* | sav3707 | sav3708  | - | 4590259 | 4590179 | 81  |                       |  |
|  | sar3713    | sav3712 | sav3713  | + | 4594744 | 4594818 | 75  |                       |  |
|  | sar3721    | sav3720 | sav3721  | + | 4602366 | 4602436 | 71  |                       |  |
|  | sar3730    | sav3729 | sav3730  | + | 4617509 | 4617600 | 92  |                       |  |
|  | sar3855    | sav3854 | sav3855  | + | 4762016 | 4762130 | 115 |                       |  |
|  | sar3858    | sav3857 | sav3858  | + | 4765693 | 4765915 | 223 |                       |  |
|  | sar3861    | sav3860 | sav3861  | - | 4769708 | 4769638 | 71  |                       |  |

|  |            |          |         |   |         |         |     |  |  |
|--|------------|----------|---------|---|---------|---------|-----|--|--|
|  | sar3892    | sav3891  | sav3892 | - | 4808188 | 4808105 | 84  |  |  |
|  | sar3948    | sav3947  | sav3948 | + | 4872344 | 4872418 | 75  |  |  |
|  | sar3970    | sav3969  | sav3970 | + | 4895793 | 4896030 | 238 |  |  |
|  | sar3975    | sav3975  | sav3976 | - | 4901101 | 4901011 | 91  |  |  |
|  | sar3980    | sav3979  | sav3980 | + | 4906190 | 4906277 | 88  |  |  |
|  | sar3982    | sav3982  | sav3983 | + | 4909537 | 4909620 | 84  |  |  |
|  | sar4024    | sav4023  | sav4024 | + | 4945054 | 4945399 | 346 |  |  |
|  | sar4076    | sav4075  | sav4076 | + | 4996048 | 4996124 | 77  |  |  |
|  | sar4105_1* | sav4104  | sav4105 | - | 5024050 | 5024095 | 46  |  |  |
|  | sar4105_2* | sav4104  | sav4105 | - | 5029867 | 5029660 | 208 |  |  |
|  | sar4113    | SAV_4112 | sav4113 | - | 5043566 | 5043450 | 117 |  |  |
|  | sar4119*   | sav4118  | sav4119 | - | 5051673 | 5051507 | 167 |  |  |
|  | sar4142*   | sav4141  | sav4142 | + | 5081598 | 5081712 | 115 |  |  |
|  | sar4154    | sav4153  | sav4154 | + | 5102609 | 5102792 | 184 |  |  |
|  | sar4183    | sav4182  | sav4183 | - | 5132493 | 5132428 | 66  |  |  |
|  | sar4221    | sav4220  | sav4221 | - | 5176975 | 5176902 | 74  |  |  |
|  | sar4227    | sav4226  | sav4227 | + | 5182448 | 5182494 | 47  |  |  |
|  | sar4246    | sav4245  | sav4246 | - | 5207192 | 5207050 | 143 |  |  |
|  | sar4274    | sav4273  | sav4274 | - | 5240107 | 5240034 | 74  |  |  |
|  | sar4280    | sav4279  | sav4280 | + | 5246032 | 5246079 | 48  |  |  |
|  | sar4323    | sav4322  | sav4323 | - | 5298534 | 5298439 | 96  |  |  |
|  | sar4325    | sav4324  | sav4325 | + | 5300359 | 5300585 | 227 |  |  |
|  | sar4449    | sav4448  | sav4449 | - | 5435097 | 5434767 | 331 |  |  |
|  | sar4464    | sav4463  | sav4464 | + | 5452987 | 5453201 | 215 |  |  |
|  | sar4466    | sav4465  | sav4466 | - | 5454893 | 5454787 | 107 |  |  |
|  | sar4518    | sav4517  | sav4518 | + | 5519730 | 5520278 | 549 |  |  |
|  | sar4599_1  | sav4598  | sav4599 | + | 5613649 | 5613695 | 47  |  |  |
|  | sar4599_2  | sav4598  | sav4599 | - | 5613740 | 5613701 | 40  |  |  |
|  | sar4604    | sav4603  | sav4604 | - | 5622151 | 5621921 | 231 |  |  |
|  | sar4605    | sav4604  | sav4605 | + | 5623152 | 5623293 | 142 |  |  |
|  | sar4634    | sav4633  | sav4634 | + | 5657853 | 5657894 | 42  |  |  |
|  | sar4635    | sav4634  | sav4635 | - | 5659414 | 5659293 | 122 |  |  |
|  | sar4691    | sav4690  | sav4691 | + | 5717781 | 5717832 | 52  |  |  |
|  | sar4726*   | sav4725  | sav4726 | + | 5758724 | 5758952 | 229 |  |  |
|  | sar4755_1  | sav4754  | sav4755 | + | 5798158 | 5798235 | 78  |  |  |
|  | sar4755_2  | sav4754  | sav4755 | - | 5798244 | 5798178 | 67  |  |  |
|  | sar4784    | sav4783  | sav4784 | + | 5827430 | 5827521 | 92  |  |  |
|  | sar5002_1  | sav5001  | sav5002 | + | 6051621 | 6051861 | 241 |  |  |
|  | sar5002_2  | sav5001  | sav5002 | - | 6052035 | 6051886 | 150 |  |  |
|  | sar5018    | sav5017  | sav5018 | - | 6075746 | 6075660 | 87  |  |  |
|  | sar5019    | sav5018  | sav5019 | - | 6076816 | 6076706 | 111 |  |  |
|  | sar5020    | sav5019  | sav5020 | - | 6077813 | 6077707 | 107 |  |  |
|  | sar5033    | sav5032  | sav5033 | - | 6092394 | 6092349 | 46  |  |  |
|  | sar5057*   | sav5056  | sav5057 | + | 6123837 | 6124050 | 214 |  |  |

|  |           |         |         |   |         |         |     |  |  |
|--|-----------|---------|---------|---|---------|---------|-----|--|--|
|  | sar5126   | sav5125 | sav5126 | - | 6225412 | 6225322 | 91  |  |  |
|  | sar5162   | sav5161 | sav5162 | - | 6270115 | 6270026 | 90  |  |  |
|  | sar5217   | sav5216 | sav5217 | - | 6322900 | 6322737 | 164 |  |  |
|  | sar5282   | sav5281 | sav5282 | - | 6399268 | 6399222 | 47  |  |  |
|  | sar5316   | sav5315 | sav5316 | + | 6443023 | 6443119 | 97  |  |  |
|  | sar5331_1 | sav5330 | sav5331 | - | 6460234 | 6460136 | 99  |  |  |
|  | sar5331_2 | sav5330 | sav5331 | - | 6460569 | 6460260 | 310 |  |  |
|  | sar5366   | sav5365 | sav5366 | - | 6506449 | 6506370 | 80  |  |  |
|  | sar5413   | sav5412 | sav5413 | - | 6563407 | 6563315 | 93  |  |  |
|  | sar5523   | sav5522 | sav5523 | + | 6694234 | 6694613 | 380 |  |  |
|  | sar5549   | sav5548 | sav5549 | - | 6712176 | 6712127 | 50  |  |  |
|  | sar5562   | sav5561 | sav5562 | - | 6850201 | 6850110 | 92  |  |  |
|  | sar5751   | sav5750 | sav5751 | + | 6953178 | 6953422 | 245 |  |  |
|  | sar5782   | sav5781 | sav5782 | + | 6987407 | 6987469 | 63  |  |  |
|  | sar5828   | sav5827 | sav5828 | + | 7034388 | 7034568 | 181 |  |  |
|  | sar5855   | sav5854 | sav5855 | - | 7063523 | 7063435 | 89  |  |  |
|  | sar5912   | sav5911 | sav5912 | + | 7121977 | 7122048 | 72  |  |  |
|  | sar5914   | sav5913 | sav5914 | - | 7125394 | 7125232 | 163 |  |  |
|  | sar6002   | sav6001 | sav6002 | + | 7229111 | 7229269 | 159 |  |  |
|  | sar6057   | sav6056 | sav6057 | + | 7291229 | 7291400 | 172 |  |  |
|  | sar6063   | sav6062 | sav6063 | + | 7297145 | 7297192 | 48  |  |  |
|  | sar6085   | sav6084 | sav6085 | - | 7322414 | 7322306 | 109 |  |  |
|  | sar6087   | sav6086 | sav6087 | - | 7325372 | 7325302 | 71  |  |  |
|  | sar6096   | sav6095 | sav6096 | - | 7332956 | 7332846 | 111 |  |  |
|  | sar6104   | sav6103 | sav6104 | + | 7340361 | 7340426 | 66  |  |  |
|  | sar6191   | sav6190 | sav6191 | + | 7441504 | 7441585 | 82  |  |  |
|  | sar6224   | sav6223 | sav6224 | + | 7476616 | 7476662 | 47  |  |  |
|  | sar6284   | sav6283 | sav6284 | - | 7542085 | 7542006 | 80  |  |  |
|  | sar6287   | sav6286 | sav6287 | + | 7546861 | 7546922 | 62  |  |  |
|  | sar6350_1 | sav6349 | sav6350 | + | 7617994 | 7618066 | 73  |  |  |
|  | sar6350_2 | sav6349 | sav6350 | + | 7618072 | 7618377 | 306 |  |  |
|  | sar6383   | sav6382 | sav6383 | - | 7656436 | 7656340 | 97  |  |  |
|  | sar6459   | sav6458 | sav6459 | - | 7736351 | 7736291 | 61  |  |  |
|  | sar6487*  | sav6486 | sav6487 | + | 7764906 | 7765176 | 271 |  |  |
|  | sar6642   | sav6641 | sav6642 | - | 7946216 | 7946167 | 50  |  |  |
|  | sar6650_1 | sav6649 | sav6650 | + | 7954775 | 7954869 | 95  |  |  |
|  | sar6650_2 | sav6649 | sav6650 | + | 7954913 | 7954999 | 87  |  |  |
|  | sar6673   | sav6672 | sav6673 | + | 7984373 | 7984448 | 76  |  |  |
|  | sar6697   | sav6696 | sav6697 | - | 8009565 | 8009483 | 83  |  |  |
|  | sar6711   | sav6710 | sav6711 | - | 8026341 | 8026244 | 98  |  |  |
|  | sar6745   | sav6744 | sav6745 | - | 8063459 | 8063309 | 151 |  |  |
|  | sar6875_1 | sav6874 | sav6875 | + | 8204040 | 8204175 | 136 |  |  |
|  | sar6875_2 | sav6874 | sav6875 | + | 8204215 | 8204302 | 88  |  |  |
|  | sar6912   | sav6911 | sav6912 | - | 8246202 | 8246140 | 63  |  |  |

|                      |            |          |          |   |         |         |     |                                           |  |
|----------------------|------------|----------|----------|---|---------|---------|-----|-------------------------------------------|--|
|                      | sar6923    | sav6922  | sav6923  | + | 8259274 | 8259573 | 300 |                                           |  |
|                      | sar6976*   | sav6975  | sav6976  | + | 8328102 | 8328240 | 139 |                                           |  |
|                      | sar6989    | sav6988  | sav6989  | - | 8348863 | 8348818 | 46  |                                           |  |
|                      | sar6990    | sav6989  | sav6990  | - | 8349781 | 8349748 | 34  |                                           |  |
|                      | sar6991    | sav6990  | sav6991  | + | 8351549 | 8351628 | 80  |                                           |  |
|                      | sar6998    | sav6997  | sav6998  | + | 8358793 | 8358966 | 174 |                                           |  |
|                      | sar7100    | sav7099  | sav7100  | - | 8461862 | 8461743 | 120 |                                           |  |
|                      | sar7183    | sav7182  | sav7183  | + | 8552575 | 8552613 | 39  |                                           |  |
|                      | sar7207    | sav7206  | sav7207  | - | 8583516 | 8583427 | 90  |                                           |  |
|                      | sar7256    | sav7255  | sav7256  | - | 8652122 | 8652078 | 45  |                                           |  |
|                      | sar7310    | sav7209  | sav7310  | + | 8718717 | 8718789 | 73  |                                           |  |
|                      | sar7393    | sav7392  | sav7393  | + | 8820487 | 8820529 | 43  |                                           |  |
|                      | sar7513    | sav7512  | sav7513  | + | 8956302 | 8956421 | 120 |                                           |  |
|                      | sar7536    | sav7535  | sav7536  | + | 8977882 | 8977950 | 69  |                                           |  |
| <b>S. venezuelae</b> |            |          |          |   |         |         |     |                                           |  |
|                      | svr0090    | sven0089 | sven0090 | + | 86665   | 86870   | 206 |                                           |  |
|                      | svr0155    | sven0154 | sven0155 | + | 161764  | 161816  | 53  |                                           |  |
|                      | svr0164    | sven0163 | sven0164 | + | 171837  | 172019  | 183 |                                           |  |
|                      | svr0205    | sven0204 | sven0205 | - | 219518  | 219415  | 104 |                                           |  |
|                      | svr0308    | sven0307 | sven0308 | - | 327545  | 327508  | 38  |                                           |  |
|                      | svr0357    | sven0356 | sven0357 | + | 383067  | 383154  | 88  |                                           |  |
|                      | svr0359    | sven0358 | sven0359 | + | 386316  | 386401  | 86  |                                           |  |
|                      | svr0413    | sven0412 | sven0413 | + | 439342  | 439378  | 37  |                                           |  |
|                      | svr0441    | sven0440 | sven0441 | + | 473451  | 473516  | 66  |                                           |  |
|                      | svr0461    | sven0460 | sven0461 | + | 501812  | 502021  | 210 |                                           |  |
|                      | svr0475    | sven0474 | sven0475 | + | 514567  | 514606  | 40  | Polyketide / non-ribosomal peptide hybrid |  |
|                      | svr0552    | sven0551 | sven0552 | - | 633652  | 633532  | 121 | Terpene                                   |  |
|                      | svr0651    | sven0650 | sven0651 | - | 763534  | 763245  | 290 |                                           |  |
|                      | svr0658    | sven0657 | sven0658 | - | 774825  | 774738  | 88  |                                           |  |
|                      | svr0735_1  | sven0734 | sven0735 | + | 846062  | 846129  | 68  |                                           |  |
|                      | svr0735_2  | sven0734 | sven0735 | - | 846191  | 846065  | 127 |                                           |  |
|                      | svr0785    | sven0784 | sven0785 | - | 905788  | 905581  | 208 |                                           |  |
|                      | svr0823    | sven0822 | sven0823 | + | 950241  | 950395  | 155 |                                           |  |
|                      | svr0825    | sven0824 | sven0825 | + | 952484  | 952535  | 52  |                                           |  |
|                      | svr0974_1* | sven0973 | sven0974 | - | 1104401 | 1104137 | 265 |                                           |  |
|                      | svr0974_2  | sven0973 | sven0974 | - | 1104518 | 1104425 | 94  |                                           |  |
|                      | svr1004    | sven1003 | sven1004 | - | 1146315 | 1146248 | 68  |                                           |  |
|                      | svr1013_1  | sven1012 | sven1013 | + | 1155885 | 1155923 | 39  |                                           |  |
|                      | svr1013_2  | sven1012 | sven1013 | - | 1155919 | 1155881 | 39  |                                           |  |
|                      | svr1013_3  | sven1012 | sven1013 | - | 1155980 | 1155941 | 40  |                                           |  |
|                      | svr1015    | sven1014 | sven1015 | - | 1157731 | 1157534 | 198 |                                           |  |
|                      | svr1031    | sven1030 | sven1031 | + | 1171874 | 1171946 | 73  |                                           |  |
|                      | svr1032    | sven1031 | sven1032 | + | 1174057 | 1174096 | 40  |                                           |  |

|            |          |          |   |         |         |     |  |  |
|------------|----------|----------|---|---------|---------|-----|--|--|
| svr1076    | sven1075 | sven1076 | - | 1219934 | 1219898 | 37  |  |  |
| svr1078    | sven1077 | sven1078 | - | 1222806 | 1222766 | 41  |  |  |
| svr1134    | sven1133 | sven1134 | + | 1281666 | 1281744 | 79  |  |  |
| svr1153    | sven1152 | sven1153 | + | 1335028 | 1335071 | 44  |  |  |
| svr1186    | sven1185 | sven1186 | + | 1335028 | 1335071 | 44  |  |  |
| svr1188    | sven1187 | sven1188 | + | 1337216 | 1337329 | 114 |  |  |
| svr1240    | sven1239 | sven1240 | + | 1393042 | 1393093 | 52  |  |  |
| svr1249    | sven1248 | sven1249 | - | 1403844 | 1403774 | 71  |  |  |
| svr1270    | sven1269 | sven1270 | + | 1431298 | 1431342 | 45  |  |  |
| svr1310    | sven1309 | sven1310 | - | 1469417 | 1469377 | 41  |  |  |
| svr1341    | sven1340 | sven1341 | + | 1503166 | 1503321 | 156 |  |  |
| svr1427    | sven1426 | sven1427 | - | 1598148 | 1597742 | 407 |  |  |
| svr1428*   | sven1427 | sven1428 | - | 1600880 | 1600603 | 278 |  |  |
| svr1577    | sven1576 | sven1577 | - | 1758249 | 1758215 | 35  |  |  |
| svr1663    | sven1662 | sven1663 | - | 1860448 | 1860336 | 113 |  |  |
| svr1676    | sven1675 | sven1676 | - | 1871497 | 1871416 | 82  |  |  |
| svr1699    | sven1698 | sven1699 | - | 1896981 | 1896944 | 38  |  |  |
| svr1760    | sven1759 | sven1760 | + | 1965201 | 1965241 | 41  |  |  |
| svr1766    | sven1765 | sven1766 | + | 1969717 | 1969824 | 108 |  |  |
| svr1769    | sven1768 | sven1769 | + | 1972038 | 1972076 | 39  |  |  |
| svr1778    | sven1777 | sven1778 | + | 1982548 | 1982633 | 86  |  |  |
| svr1804    | sven1803 | sven1804 | - | 2009995 | 2009848 | 148 |  |  |
| svr1820    | sven1819 | sven1820 | - | 2026024 | 2025909 | 116 |  |  |
| svr1875    | sven1874 | sven1875 | + | 2086548 | 2086588 | 41  |  |  |
| svr1914    | sven1913 | sven1914 | - | 2133063 | 2133003 | 61  |  |  |
| svr1920    | sven1919 | sven1920 | - | 2135820 | 2135747 | 74  |  |  |
| svr1942    | sven1941 | sven1942 | + | 2158399 | 2158459 | 61  |  |  |
| svr2034    | sven2033 | sven2034 | + | 2246355 | 2246432 | 78  |  |  |
| svr2100    | sven2099 | sven2100 | - | 2291833 | 2291786 | 48  |  |  |
| svr2113    | sven2112 | sven2113 | - | 2299104 | 2299047 | 58  |  |  |
| svr2128    | sven2127 | sven2128 | + | 2307576 | 2307608 | 33  |  |  |
| svr2153    | sven2152 | sven2153 | - | 2323486 | 2323419 | 68  |  |  |
| svr2173_1* | sven2172 | sven2173 | + | 2338858 | 2338912 | 55  |  |  |
| svr2173_2* | sven2172 | sven2173 | + | 2339004 | 2339094 | 91  |  |  |
| svr2184    | sven2183 | sven2184 | - | 2350942 | 2350908 | 35  |  |  |
| svr2186    | sven2185 | sven2186 | + | 2354566 | 2354657 | 92  |  |  |
| svr2213    | sven2212 | sven2213 | - | 2382190 | 2382148 | 43  |  |  |
| svr2222    | sven2221 | sven2222 | - | 2391316 | 2391229 | 88  |  |  |
| svr2286    | sven2285 | sven2286 | + | 2466170 | 2466321 | 152 |  |  |
| svr2309    | sven2308 | sven2309 | + | 2492736 | 2492818 | 83  |  |  |
| svr2325    | sven2324 | sven2325 | - | 2508047 | 2507989 | 59  |  |  |
| svr2374    | sven2373 | sven2374 | + | 2564947 | 2564990 | 44  |  |  |
| svr2380    | sven2379 | sven2380 | + | 2573116 | 2573306 | 191 |  |  |
| svr2404    | sven2403 | sven2404 | + | 2605276 | 2605326 | 51  |  |  |

|            |          |          |   |         |         |     |             |  |
|------------|----------|----------|---|---------|---------|-----|-------------|--|
| svr2416    | sven2415 | sven2416 | + | 2617740 | 2617829 | 90  |             |  |
| svr2475    | sven2474 | sven2475 | + | 2692459 | 2692540 | 82  |             |  |
| svr2477    | sven2476 | sven2477 | + | 2694888 | 2694962 | 75  |             |  |
| svr2486    | sven2485 | sven2486 | + | 2701949 | 2702025 | 77  |             |  |
| svr2501    | sven2500 | sven2501 | - | 2712672 | 2712634 | 39  |             |  |
| svr2503    | sven2502 | sven2503 | + | 2713691 | 2713763 | 73  |             |  |
| svr2535    | sven2534 | sven2535 | + | 2753750 | 2753848 | 99  |             |  |
| svr2569    | sven2568 | sven2569 | - | 2795716 | 2795658 | 59  | Siderophore |  |
| svr2605    | sven2604 | sven2605 | + | 2840678 | 2840755 | 78  |             |  |
| svr2658    | sven2657 | sven2658 | - | 2893438 | 2893355 | 84  |             |  |
| svr2670    | sven2669 | sven2670 | + | 2904517 | 2904558 | 42  |             |  |
| svr2676    | sven2675 | sven2676 | - | 2909883 | 2909847 | 37  |             |  |
| svr2691    | sven2690 | sven2691 | + | 2925203 | 2925300 | 98  |             |  |
| svr2719    | sven2718 | sven2719 | - | 2960718 | 2960571 | 148 |             |  |
| svr2763*   | sven2762 | sven2763 | - | 3026714 | 3026501 | 214 |             |  |
| svr2831    | sven2830 | sven2831 | - | 3105245 | 3105096 | 150 |             |  |
| svr3031    | sven3030 | sven3031 | + | 3316921 | 3317100 | 180 |             |  |
| svr3058    | sven3057 | sven3058 | - | 3349419 | 3349351 | 69  |             |  |
| svr3068    | sven3067 | sven3068 | + | 3362151 | 3362221 | 71  |             |  |
| svr3195_1* | sven3194 | sven3195 | - | 3501490 | 3501255 | 236 |             |  |
| svr3195_2* | sven3194 | sven3195 | + | 3501555 | 3501600 | 46  |             |  |
| svr3209    | sven3208 | sven3209 | - | 3515843 | 3515777 | 67  |             |  |
| svr3316    | sven3315 | sven3316 | + | 3631774 | 3631883 | 110 |             |  |
| svr3328    | sven3327 | sven3328 | - | 3644356 | 3644215 | 142 |             |  |
| svr3329    | sven3328 | sven3329 | + | 3645319 | 3645545 | 227 |             |  |
| svr3373    | sven3372 | sven3373 | - | 3692244 | 3692163 | 82  |             |  |
| svr3390    | sven3389 | sven3390 | - | 3703742 | 3703697 | 46  |             |  |
| svr3412    | sven3411 | sven3412 | + | 3729165 | 3729223 | 59  |             |  |
| svr3468    | sven3467 | sven3468 | + | 3780761 | 3781260 | 500 |             |  |
| svr3504    | sven3503 | sven3504 | + | 3813879 | 3814075 | 197 |             |  |
| svr3556    | sven3555 | sven3556 | - | 3862804 | 3862721 | 84  |             |  |
| svr3584    | sven3583 | sven3584 | - | 3895923 | 3895890 | 34  |             |  |
| svr3641    | sven3640 | sven3641 | - | 3954043 | 3953989 | 55  |             |  |
| svr3699    | sven3698 | sven3699 | + | 4016611 | 4016686 | 76  |             |  |
| svr3707    | sven3706 | sven3707 | + | 4022640 | 4022733 | 94  |             |  |
| svr3746    | sven3745 | sven3746 | - | 4070199 | 4070157 | 43  |             |  |
| svr3778    | sven3777 | sven3778 | - | 4105389 | 4105357 | 33  |             |  |
| svr3789*   | sven3788 | sven3789 | + | 4113664 | 4113824 | 161 |             |  |
| svr3832*   | sven3831 | sven3832 | + | 4157390 | 4157458 | 69  |             |  |
| svr3869    | sven3868 | sven3869 | + | 4202938 | 4203060 | 123 |             |  |
| svr3877*   | sven3876 | sven3877 | + | 4217760 | 4217964 | 205 |             |  |
| svr3967    | sven3966 | sven3967 | - | 4308327 | 4307973 | 355 |             |  |
| svr3995    | sven3994 | sven3995 | + | 4331751 | 4331835 | 85  |             |  |
| svr3999    | sven3998 | sven3999 | + | 4336011 | 4336100 | 90  |             |  |

|         |          |          |   |         |         |     |               |  |
|---------|----------|----------|---|---------|---------|-----|---------------|--|
| svr4012 | sven4011 | sven4012 | + | 4345906 | 4346105 | 200 |               |  |
| svr4031 | sven4030 | sven4031 | + | 4365408 | 4365444 | 37  |               |  |
| svr4046 | sven4045 | sven4046 | + | 4382673 | 4382911 | 239 |               |  |
| svr4090 | sven4089 | sven4090 | + | 4433744 | 4433822 | 79  |               |  |
| svr4155 | sven4154 | sven4155 | + | 4496853 | 4496938 | 86  |               |  |
| svr4204 | sven4203 | sven4204 | + | 4548689 | 4548728 | 40  |               |  |
| svr4210 | sven4209 | sven4210 | - | 4555638 | 4555522 | 117 |               |  |
| svr4236 | sven4235 | sven4236 | + | 4580872 | 4580998 | 127 |               |  |
| svr4279 | sven4278 | sven4279 | + | 4632238 | 4632272 | 35  |               |  |
| svr4346 | sven4345 | sven4346 | - | 4703066 | 4702976 | 91  |               |  |
| svr4464 | sven4463 | sven4464 | - | 4811777 | 4811740 | 38  |               |  |
| svr4465 | sven4464 | sven4465 | + | 4812758 | 4812839 | 82  |               |  |
| svr4477 | sven4476 | sven4477 | - | 4828765 | 4828614 | 152 |               |  |
| svr4511 | sven4510 | sven4511 | + | 4865853 | 4865892 | 40  |               |  |
| svr4633 | sven4632 | sven4633 | + | 4987729 | 4987852 | 124 |               |  |
| svr4647 | sven4646 | sven4647 | - | 5004978 | 5004937 | 42  | Melanin       |  |
| svr4693 | sven4692 | sven4693 | + | 5048583 | 5048630 | 48  |               |  |
| svr4737 | sven4736 | sven4737 | + | 5093394 | 5093590 | 197 |               |  |
| svr4824 | sven4823 | sven4824 | - | 5188990 | 5188941 | 50  |               |  |
| svr4904 | sven4903 | sven4904 | - | 5282887 | 5282654 | 234 |               |  |
| svr5026 | sven5025 | sven5026 | - | 5410945 | 5410906 | 40  |               |  |
| svr5058 | sven5057 | sven5058 | + | 5443073 | 5443117 | 45  |               |  |
| svr5092 | sven5091 | sven5092 | - | 5480122 | 5480023 | 100 | Butyrolactone |  |
| svr5117 | sven5116 | sven5117 | - | 5524420 | 5524299 | 122 | Thiopeptide   |  |
| svr5272 | sven5271 | sven5272 | - | 5695125 | 5694800 | 326 |               |  |
| svr5279 | sven5278 | sven5279 | + | 5706907 | 5706987 | 81  |               |  |
| svr5283 | sven5282 | sven5283 | - | 5713220 | 5713165 | 56  |               |  |
| svr5316 | sven5315 | sven5316 | + | 5744324 | 5744401 | 78  |               |  |
| svr5393 | sven5392 | sven5393 | + | 5837098 | 5837146 | 49  |               |  |
| svr5428 | sven5427 | sven5428 | - | 5884275 | 5884213 | 63  |               |  |
| svr5510 | sven5509 | sven5510 | + | 5985187 | 5985241 | 55  |               |  |
| svr5514 | sven5513 | sven5514 | + | 5992941 | 5993104 | 164 |               |  |
| svr5535 | sven5534 | sven5535 | + | 6017922 | 6017963 | 42  |               |  |
| svr5558 | sven5557 | sven5558 | + | 6039597 | 6039637 | 41  |               |  |
| svr5635 | sven5634 | sven5635 | - | 6121371 | 6121303 | 69  |               |  |
| svr5651 | sven5650 | sven5651 | - | 6133699 | 6133654 | 46  |               |  |
| svr5664 | sven5663 | sven5664 | + | 6147492 | 6147624 | 133 |               |  |
| svr5679 | sven5678 | sven5679 | + | 6160952 | 6160989 | 38  |               |  |
| svr5681 | sven5680 | sven5681 | + | 6161818 | 6161861 | 44  |               |  |
| svr5700 | sven5699 | sven5700 | + | 6184424 | 6184564 | 141 |               |  |
| svr5729 | sven5728 | sven5729 | + | 6213966 | 6214077 | 112 |               |  |
| svr5830 | sven5829 | sven5830 | - | 6349417 | 6349380 | 38  |               |  |
| svr5922 | sven5921 | sven5922 | + | 6449278 | 6449447 | 170 |               |  |
| svr5940 | sven5939 | sven5940 | - | 6464189 | 6464112 | 78  |               |  |



|  |         |                 |                 |   |         |         |     |                       |  |
|--|---------|-----------------|-----------------|---|---------|---------|-----|-----------------------|--|
|  | svr5941 | <i>sven5940</i> | <i>sven5941</i> | + | 6468076 | 6468164 | 89  |                       |  |
|  | svr6086 | <i>sven6085</i> | <i>sven6086</i> | - | 6629464 | 6629262 | 203 |                       |  |
|  | svr6110 | <i>sven6109</i> | <i>sven6110</i> | - | 6654343 | 6654245 | 99  |                       |  |
|  | svr6112 | <i>sven6111</i> | <i>sven6112</i> | + | 6656954 | 6657029 | 76  |                       |  |
|  | svr6179 | <i>sven6178</i> | <i>sven6179</i> | + | 6730240 | 6730368 | 129 | Non-ribosomal peptide |  |
|  | svr6310 | <i>sven6309</i> | <i>sven6310</i> | - | 6886369 | 6886288 | 82  |                       |  |
|  | svr6402 | <i>sven6401</i> | <i>sven6402</i> | - | 6987310 | 6987166 | 145 |                       |  |
|  | svr6475 | <i>sven6474</i> | <i>sven6475</i> | - | 7064808 | 7064763 | 46  |                       |  |
|  | svr6552 | <i>sven6551</i> | <i>sven6552</i> | + | 7160290 | 7160453 | 164 |                       |  |
|  | svr6559 | <i>sven6558</i> | <i>sven6559</i> | + | 7167725 | 7167830 | 106 |                       |  |
|  | svr6576 | <i>sven6575</i> | <i>sven6576</i> | + | 7185047 | 7185087 | 41  |                       |  |
|  | svr7049 | <i>sven7048</i> | <i>sven7049</i> | - | 7715443 | 7715260 | 184 | Non-ribosomal peptide |  |
|  | svr7129 | <i>sven7128</i> | <i>sven7129</i> | + | 7825187 | 7825254 | 68  |                       |  |
|  | svr7278 | <i>sven7277</i> | <i>sven7278</i> | + | 8008644 | 8008754 | 111 |                       |  |
|  | svr7297 | <i>sven7296</i> | <i>sven7297</i> | - | 8027121 | 8026909 | 213 |                       |  |
|  | svr7351 | <i>sven7350</i> | <i>sven7351</i> | + | 8083855 | 8083893 | 39  |                       |  |

\* sRNA found adjacent to a tRNA or rRNA gene

<sup>x</sup> unusual gene order in *S. avermitilis*

<sup>y</sup> locations of clusters as per Nett *et al.* (2009) for *S. avermitilis* and *S. coelicolor*, and using the program antiSMASH (Medema *et al.*, 2011) for *S. venezuelae*.

#### References:

Medema MH, Blin K, Cimermancic P, de Jager V, Zakrzewski P, et al. (2011) antiSMASH: rapid identification, annotation and analysis of secondary metabolite biosynthesis gene clusters in bacterial and fungal genome sequences. *Nucleic Acids Res.* doi: 10.1093/nar/gkr466

Nett M, Ikeda H, Moore BS (2009) Genomic basis for natural product biosynthetic diversity in the actinomycetes. *Nat Prod Rep* 26: 1362-1384

**Table S4: Conserved intergenic sRNAs in *Streptomyces***

|                                                                    | <i>S. coelicolor</i> | <i>S. avermitilis</i> | <i>S. venezuelae</i> | Potential for encoding a short conserved ORF |
|--------------------------------------------------------------------|----------------------|-----------------------|----------------------|----------------------------------------------|
| <b>Conserved in three species</b>                                  |                      |                       |                      |                                              |
|                                                                    | scr1104              | sar1503               | svr0735_2            | -                                            |
|                                                                    | scr1434              | sar6912               | svr1031              | -                                            |
|                                                                    | scr1594              | sar6745               | svr1188              | -                                            |
|                                                                    | scr1792              | sar6487               | svr1428              | -                                            |
|                                                                    | scr2107              | sar6096               | svr1766              | -                                            |
|                                                                    | scr2117              | sar6085               | svr1778              | Y (18 amino acids)                           |
|                                                                    | scr2147              | sar6057               | svr1804              | -                                            |
|                                                                    | scr2634              | sar5413               | svr2416              | -                                            |
|                                                                    | scr2736              | sar5331_1             | svr2535              | -                                            |
|                                                                    | scr2952              | sar5126               | svr2719              | -                                            |
|                                                                    | scr3077              | sar3510               | svr2831              | -                                            |
|                                                                    | scr3334              | sar4726               | svr3195_1            | -                                            |
|                                                                    | scr3558              | sar4605               | svr3328              | -                                            |
|                                                                    | scr3559              | sar4604               | svr3329              | -                                            |
|                                                                    | scr3920              | sar4274               | svr3699              | -                                            |
|                                                                    | scr4076              | sar4142               | svr3832              | -                                            |
|                                                                    | scr4123              | sar4105_1             | svr3328              | -                                            |
|                                                                    | scr4339              | sar3892               | svr4155              | -                                            |
|                                                                    | scr4395              | sar3855               | svr4210              | -                                            |
|                                                                    | scr4619              | sar4221               | svr1924              | -                                            |
|                                                                    | scr4677              | sar3140               | svr3556              | -                                            |
|                                                                    | scr5239              | sar3018               | svr4904              | -                                            |
|                                                                    | scr5583              | sar2652               | svr5279              | -                                            |
|                                                                    | scr5839              | sar2421               | svr5514              | -                                            |
|                                                                    | scr5917              | sar0324_1             | svr3468              | -                                            |
|                                                                    | scr6214              | sar2017               | svr6086              | -                                            |
| <b>Conserved in <i>S. avermitilis</i> and <i>S. venezuelae</i></b> |                      |                       |                      |                                              |
|                                                                    |                      | sar4154               | svr0461              | -                                            |
|                                                                    |                      | sar6191               | svr1676              |                                              |
|                                                                    |                      | sar5855               | svr2034              | -                                            |
|                                                                    |                      | sar5162               | svr2670              | -                                            |
|                                                                    |                      | sar3677               | svr3031              | -                                            |
|                                                                    |                      | sar4755_1             | svr3556              | -                                            |
|                                                                    |                      | sar4227               | svr3746              | -                                            |
|                                                                    |                      | sar3861               | svr4204              | -                                            |
|                                                                    |                      | sar5020               | svr4465              | -                                            |
|                                                                    |                      | sar2517               | svr5393              | -                                            |
|                                                                    |                      | sar1689               | svr6402              | -                                            |
| <b>Conserved in <i>S. coelicolor</i> and <i>S. avermitilis</i></b> |                      |                       |                      |                                              |
|                                                                    | scr0959              | sar7256               |                      | -                                            |
|                                                                    | scr1363              | sar6998               |                      | Y (12-13 amino acids)                        |

|                                                                                      |         |           |         |                       |
|--------------------------------------------------------------------------------------|---------|-----------|---------|-----------------------|
|                                                                                      | scr1390 | sar6976   |         | -                     |
|                                                                                      | scr1424 | sar6923   |         | -                     |
|                                                                                      | scr1961 | sar6284   |         | -                     |
|                                                                                      | scr2101 | sar6103   |         | -                     |
|                                                                                      | scr2136 | sar6063   |         | -                     |
|                                                                                      | scr2822 | sar0959   |         | -                     |
|                                                                                      | scr3020 | sar5057   |         | Y (54-55 amino acids) |
|                                                                                      | scr3202 | sar3694_2 |         | -                     |
|                                                                                      | scr3679 | sar4464   |         | -                     |
|                                                                                      | scr4108 | sar4119   |         | Y (17 amino acids)    |
|                                                                                      | scr4139 | sar4076   |         | -                     |
|                                                                                      | scr4233 | sar3970   |         | -                     |
|                                                                                      | scr4389 | sar3858   |         | -                     |
|                                                                                      | scr4689 | sar0088   |         | -                     |
|                                                                                      | scr5439 | sar2808   |         | -                     |
|                                                                                      | scr5710 | sar2548   |         | -                     |
|                                                                                      | scr6106 | sar2124   |         | -                     |
| <b>Conserved in<br/><i>S. coelicolor</i><br/>and <i>S.</i><br/><i>venezuelae</i></b> |         |           |         |                       |
|                                                                                      | scr4628 |           | svr1914 | -                     |
|                                                                                      | scr4684 |           | svr3504 | -                     |

**Table S5: Locations and names of 20 highly expressed stable degradation products.**

| <b>Gene</b>     | <b>CDS Start<br/>(nt position)</b> | <b>CDS Stop<br/>(nt position)</b> | <b>Strand</b> | <b>Stable region<br/>designation*</b> | <b>Stable Start<br/>(nt position)</b> | <b>Stable Stop<br/>(nt position)</b> | <b>Length</b> |
|-----------------|------------------------------------|-----------------------------------|---------------|---------------------------------------|---------------------------------------|--------------------------------------|---------------|
| <i>sven0433</i> | 463756                             | 464730                            | +             | sven0433_sr1                          | 463897                                | 463972                               | 76            |
| <i>sven0729</i> | 840508                             | 841308                            | -             | sven0729_sr1                          | 840939                                | 841016                               | 78            |
| <i>sven0847</i> | 971829                             | 972173                            | +             | sven0847_sr1                          | 972049                                | 972100                               | 52            |
| <i>sven1454</i> | 1631142                            | 1632533                           | +             | sven1454_sr1                          | 1631298                               | 1631375                              | 78            |
| <i>sven1480</i> | 1656022                            | 1656387                           | -             | sven1480_sr1                          | 1656329                               | 1656370                              | 42            |
| <i>sven2285</i> | 2465015                            | 2466037                           | -             | sven2285_sr1                          | 2465419                               | 2465480                              | 62            |
| <i>sven2374</i> | 2564998                            | 2566152                           | -             | sven2374_sr1                          | 2565389                               | 2565477                              | 89            |
| <i>sven2374</i> | 2564998                            | 2566152                           | -             | sven2374_sr2                          | 2565153                               | 2565214                              | 62            |
| <i>sven2917</i> | 3176014                            | 3176742                           | -             | sven2917_sr1                          | 3176510                               | 3176563                              | 54            |
| <i>sven3045</i> | 3331513                            | 3334293                           | -             | sven3045_sr1                          | 3332336                               | 3332420                              | 85            |
| <i>sven3682</i> | 4003974                            | 4004264                           | +             | sven3682_sr1                          | 4004048                               | 4004088                              | 41            |
| <i>sven3714</i> | 4031950                            | 4032951                           | +             | sven3714_sr1                          | 4032618                               | 4032681                              | 64            |
| <i>sven3715</i> | 4032972                            | 4036562                           | +             | sven3715_sr1                          | 4033149                               | 4033208                              | 60            |
| <i>sven3715</i> | 4032972                            | 4036562                           | +             | sven3715_sr2                          | 4033257                               | 4033295                              | 39            |
| <i>sven3715</i> | 4032972                            | 4036562                           | +             | sven3715_sr3                          | 4034482                               | 4034531                              | 50            |
| <i>sven4147</i> | 4488857                            | 4491217                           | -             | sven4147_sr1                          | 4490785                               | 4490858                              | 74            |
| <i>sven4589</i> | 4944297                            | 4945223                           | +             | sven4589_sr1                          | 4945085                               | 4945170                              | 86            |
| <i>sven4918</i> | 5296230                            | 5296568                           | +             | sven4918_sr1                          | 5296312                               | 5296357                              | 46            |
| <i>sven5046</i> | 5429952                            | 5430920                           | -             | sven5046_sr1                          | 5430157                               | 5430227                              | 71            |
| <i>sven5212</i> | 5633123                            | 5634463                           | +             | sven5212_sr1                          | 5633165                               | 5633207                              | 43            |

\* sr denotes 'stable region'

**Table S6. Oligonucleotide primers used in this study.**

| Primer / probe name | Sequence (5' - 3')              | Purpose                                                                                                           |
|---------------------|---------------------------------|-------------------------------------------------------------------------------------------------------------------|
| 16S fwd             | AGAGTTTGATCCTGGCTCAG            | DNA contamination check; transcription profiling for 16S rRNA                                                     |
| 16S rev             | CGAACCTCGCAGATGCCTG             | DNA contamination check; RT and transcription profiling for 16S rRNA                                              |
| sco4606 in fwd      | GTCCCCTTTCTGATCGGTCT            | RT ( <i>as_nuoL2M2</i> ) and transcription profiling for <i>as_nuoL2M2</i> and <i>nuoL2/sco4606</i>               |
| sco4606 in rev      | ATCGTCGAGTAGGCCAGGAC            | RT ( <i>nuoL2/sco4606</i> ) and transcription profiling for <i>as_nuoL2/M2</i> and <i>nuoL2/sco4606</i>           |
| sco4567 in fwd      | GATCGCGTACGTCAAGGAGT            | RT ( <i>as_nuoEF</i> ) and transcription profiling for <i>as_nuoEF</i> and <i>nuoF/sco4567</i>                    |
| sco4567 in rev      | GTGAGGGTGAGATCGAGTCC            | RT ( <i>nuoF/sco4567</i> ) and transcription profiling for <i>as_nuoEF</i> and <i>nuoF/sco4567</i>                |
| sco6762 in fwd      | CTCGCCTTCTCCTTCCAGC             | RT ( <i>as_hopC</i> ) and transcription profiling for <i>as_hopC</i> and <i>hopC/sco6762</i>                      |
| sco6762 in rev      | CGATCCGGTCGAGGAACC              | RT ( <i>hopC/sco6762</i> ) and transcription profiling for <i>as_hopC</i> and <i>hopC/sco6762</i>                 |
| sco3578 5' in fwd   | ATGATGCTCGACATGAAGCG            | Transcription profiling for 5' end of <i>sco3578</i>                                                              |
| sco3578 5' in rev   | GAGCGATTGGTAGAAGGGGT            | RT and transcription profiling for 5' end of <i>sco3578</i>                                                       |
| sco3578 3' in fwd   | CGGGAAAGCTGGACTTCGTA            | RT (3' end <i>wbIA/sco3579</i> ) and transcription profiling for 3' end of <i>sco3578</i> and <i>wbIA/sco3579</i> |
| sco3578 3' in rev   | CGTACGTGTCGGGAGAGTTG            | RT (3' end <i>sco3578</i> ) and transcription profiling for 3' end of <i>wbIA/sco3579</i> and <i>sco3578</i>      |
| sco3579 5' in fwd   | CTGCTCCCTGAACGAACAGT            | RT and transcription profiling for 5' end of <i>wbIA/sco3579</i>                                                  |
| sco3579 5' in rev   | GCTGGGTAACCGACTGGAG             | Transcription profiling for 5' end of <i>wbIA/sco3579</i>                                                         |
| Conserved sRNA1     | GCCCCGGTGAAGGTTGAGAAGACGATCACGA | Northern probe to detect <i>scr2634</i> , <i>sar5413</i> , and <i>svr2416</i>                                     |
| Conserved sRNA2     | GGGGGAGCCGAGTCGGGCAGTTCGGGA     | Northern probe to detect <i>scr5583</i> , <i>sar2652</i> , and <i>svr5279</i>                                     |
| Conserved sRNA3     | AACGAAGCCCCGATCACGGGGGAACAA     | Northern probe to detect <i>scr1434</i> , <i>sar6912</i> , and                                                    |

|               |                           |                                                                                             |
|---------------|---------------------------|---------------------------------------------------------------------------------------------|
|               |                           | sve1031                                                                                     |
| sar2765       | ACACGCCAGACTCTGCACTCTCCCG | Northern probe to detect sar2765.                                                           |
| sar3980       | TCGCCTCCATTGCCGCGTTCAGACA | Northern probe to detect sar3980.                                                           |
| scr3716       | TGCCTGGAGGCCTCGAACCGTTCCA | Northern probe to detect sar3716.                                                           |
| scr3931       | TGGAAAGCGAACGGGTGGCCCGGTT | Northern probe to detect sar3931.                                                           |
| svr5535       | GCCGCTCCCGGCACCGGGGCCCTCG | Northern probe to detect svr5535.                                                           |
| sven_2734_sr1 | CCAGGGTGCCCGACACGCCGTCCGC | Northern probe to detect a stable degradation product within the coding region of sven2734. |
| 5S_rRNA       | CCCTGCAGTACCATCGGC        | Northern probe to detect 5S rRNA.                                                           |

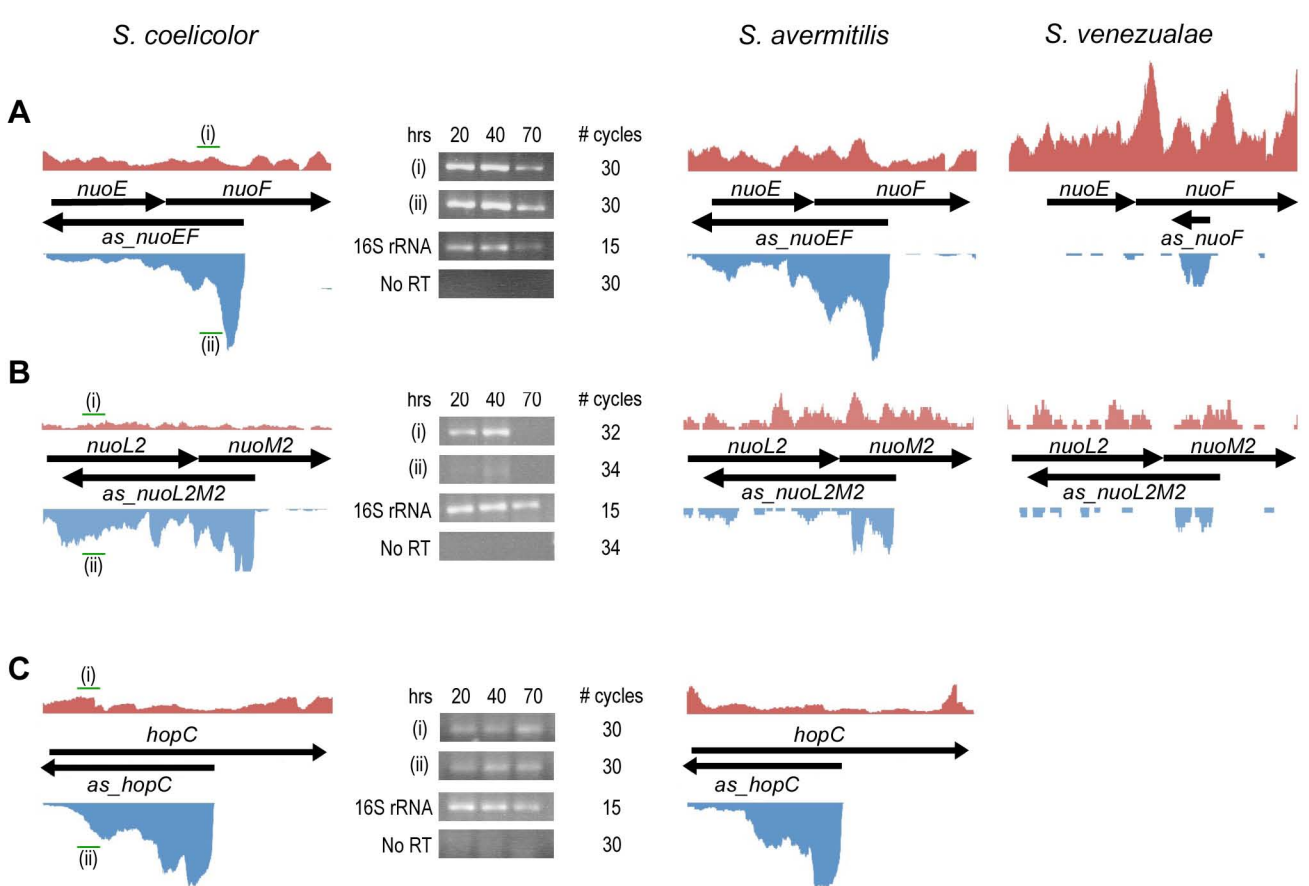

**Figure S1: Expression profiles and semi-quantitative RT-PCR analysis of select antisense RNAs.** A) Expression profiles (*S. coelicolor*, *S. avermitilis*, and *S. venezuelae*) and semi-quantitative RT-PCR analysis (*S. coelicolor*) of the antisense RNA expressed opposite *nuoE* and *nuoF*. B) Expression profiles (*S. coelicolor*, *S. avermitilis*, and *S. venezuelae*) and semi-quantitative RT-PCR analysis (*S. coelicolor*) of the antisense RNA expressed opposite *nuoL2* and *nuoM2*. C) Expression profiles (*S. coelicolor* and *S. avermitilis*) and semi-quantitative RT-PCR analysis (*S. coelicolor*) of the antisense RNA expressed opposite *hopC*. Relative sequence reads at each nucleotide position on the positive strand (top) are shown in red, while negative strand profiles are shown in blue. As expression levels of different genes varied over several orders of magnitude, the y-axis for each gene set was scaled independently. Semi-quantitative RT-PCR analyses examined the temporal expression of each sense and antisense gene (time of RNA extraction is indicated in hours). Reverse transcribed 16S rRNA was amplified as a control for RNA integrity and loading levels. Fragment (i) was reverse transcribed from transcripts originating from the positive strand, while (ii) was reverse transcribed from transcripts originating from the negative strand. The locations of these primers are indicated above or below the gene annotation.

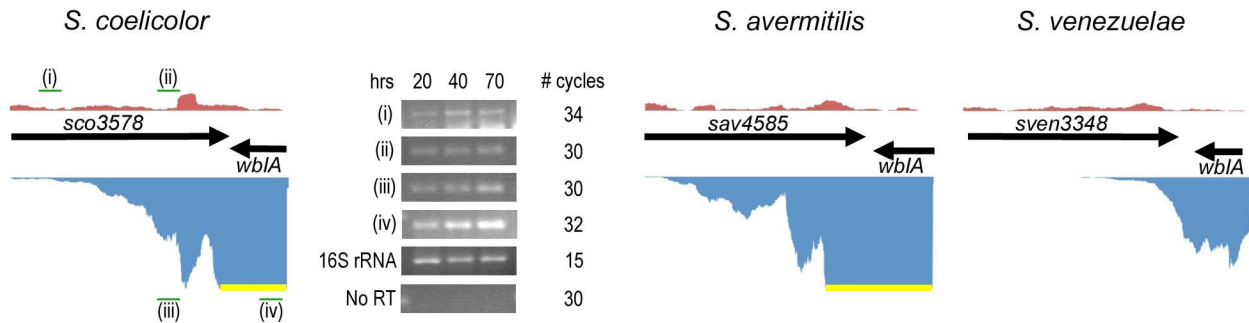

**Figure S2: Expression profiles and semi-quantitative RT-PCR analysis of the *wblA* cutoRNA shared with its downstream gene in *S. coelicolor* (*sco3578*), *S. avermitilis* (*sav4585*) and *S. venezuelae* (*sven3348*).** Relative sequence reads at each nucleotide position on the positive strand (top) are shown in red; negative strand profiles are shown in blue. When expression levels differed greatly for the positive and negative strand within a gene pair, the profile of the more highly expressed gene was cut off with a yellow line to ensure expression from the more lowly expressed gene could still be visualized. Semi-quantitative RT-PCR analyses over a developmental time course (time of RNA harvest is shown in hours), was conducted to assess cutoRNA expression. Reverse transcribed 16S rRNA was amplified to ensure RNA integrity and to serve as a loading control. Products (i) and (ii) were reverse transcribed from positive strand-derived transcripts, while (iii) and (iv) were reverse transcribed from transcripts originating from the negative strand. Primer locations are indicated above or below the gene annotation.
